# Supplementary material for: Effects of Endocrine Therapy on Cardiovascular Diseases and Type 2 Diabetes Among Breast Cancer Survivors: The National Health Insurance Service Database of Korea
Source: PubMed Central journal article supplement — J Am Heart Assoc. 2022 Oct 17;11(20):e026743. doi: 10.1161/JAHA.122.026743 (PMC9673673; doi:10.1161/jaha.122.026743), 2022-10-17
Supplement: JAH3-11-e026743-s001.pdf [file JAH3-11-e026743-s001.pdf]

# Supplemental Material



|                                      |        |        |        |        |        |        |       |        |        |
|--------------------------------------|--------|--------|--------|--------|--------|--------|-------|--------|--------|
| No                                   | 6,876  | (38.1) | 9,279  | (27.8) | 3,876  | (25.3) | 1,539 | (29.1) | <0.001 |
| Yes                                  | 11,154 | (61.9) | 24,128 | (72.2) | 11,465 | (74.7) | 3,746 | (70.9) |        |
| Trastuzumab                          |        |        |        |        |        |        |       |        |        |
| No                                   | 14,543 | (80.7) | 30,957 | (92.7) | 13,687 | (89.2) | 4,827 | (91.3) | <0.001 |
| Yes                                  | 3,487  | (19.3) | 2,450  | (7.3)  | 1,654  | (10.8) | 458   | (8.7)  |        |
| Hypertension                         |        |        |        |        |        |        |       |        |        |
| No                                   | 15,385 | (85.3) | 30,679 | (91.8) | 11,576 | (75.5) | 4,533 | (85.8) | <0.001 |
| Yes                                  | 2,645  | (14.7) | 2,728  | (8.2)  | 3,765  | (24.5) | 752   | (14.2) |        |
| Dyslipidemia                         |        |        |        |        |        |        |       |        |        |
| No                                   | 15,914 | (88.3) | 31,059 | (93.0) | 12,615 | (82.2) | 4,762 | (90.1) | <0.001 |
| Yes                                  | 2,116  | (11.7) | 2,348  | (7.0)  | 2,726  | (17.8) | 523   | (9.9)  |        |
| Osteoporosis                         |        |        |        |        |        |        |       |        |        |
| No                                   | 16,304 | (90.4) | 31,364 | (93.9) | 13,335 | (86.9) | 4,739 | (89.7) | <0.001 |
| Yes                                  | 1,726  | (9.6)  | 2,043  | (6.1)  | 2,006  | (13.1) | 546   | (10.3) |        |
| Body mass index (kg/m <sup>2</sup> ) |        |        |        |        |        |        |       |        |        |
| <23                                  | 8,681  | (48.2) | 19,041 | (57.0) | 5,715  | (37.3) | 2,534 | (48.0) | <0.001 |
| ≥23                                  | 9,349  | (51.9) | 14,366 | (43.0) | 9,626  | (62.8) | 2,751 | (52.1) |        |
| Smoking                              |        |        |        |        |        |        |       |        |        |
| Never                                | 17,005 | (94.3) | 31,312 | (93.7) | 14,557 | (94.9) | 5,027 | (95.1) | <0.001 |
| Ever                                 | 1,025  | (5.7)  | 2,095  | (6.3)  | 784    | (5.1)  | 258   | (4.9)  |        |
| Alcohol consumption                  |        |        |        |        |        |        |       |        |        |
| Never                                | 13,859 | (76.9) | 23,786 | (71.2) | 12,645 | (82.4) | 4,083 | (77.3) | <0.001 |
| Ever                                 | 4,171  | (23.1) | 9,621  | (28.8) | 2,696  | (17.6) | 1,202 | (22.7) |        |
| Physical activity                    |        |        |        |        |        |        |       |        |        |
| No                                   | 5,151  | (28.6) | 8,771  | (26.3) | 4,363  | (28.4) | 1,754 | (33.2) | <0.001 |
| Yes                                  | 12,879 | (71.4) | 24,636 | (73.8) | 10,978 | (71.6) | 3,531 | (66.8) |        |
| Menopausal status                    |        |        |        |        |        |        |       |        |        |
| Pre-menopausal                       | 9,324  | (51.7) | 27,801 | (83.2) | 3,107  | (20.3) | 3,240 | (61.3) | <0.001 |
| Post-menopausal                      | 8,706  | (48.3) | 5,606  | (16.8) | 12,234 | (79.8) | 2,045 | (38.7) |        |

AIs, aromatase inhibitors; SERMs, selective estrogen receptors modulators. \*P-value by chi-square test for categorical variables and ANOVA for continuous variable.

Table S2. The subgroup analyses by age at diagnosis (&lt;55 vs. ≥55 years)

|                         | Age <55 years |               |        |          |                       |              | Age ≥55 years |     |          |                       |      |             | P-value | I <sup>2</sup> |
|-------------------------|---------------|---------------|--------|----------|-----------------------|--------------|---------------|-----|----------|-----------------------|------|-------------|---------|----------------|
|                         | No. of total  | No. of events | (%)    | 1,000 PY | Adjusted HR (95% CI)* | No. of total | No. of events | (%) | 1,000 PY | Adjusted HR (95% CI)* |      |             |         |                |
| <b>Composite of CVD</b> |               |               |        |          |                       |              |               |     |          |                       |      |             |         |                |
| Non-users               | 25,233        | 600           | (2.38) | 136.0    | 1.00                  | (Reference)  | 11,466        | 739 | (6.45)   | 53.9                  | 1.00 | (Reference) |         |                |
| SERMs                   | 55,457        | 1,113         | (2.01) | 290.1    | 1.16                  | (1.05-1.28)  | 5,738         | 413 | (7.20)   | 27.9                  | 1.15 | (1.02-1.29) | 0.90    | 0.0%           |
| AIs                     | 9,018         | 288           | (3.19) | 49.3     | 1.21                  | (1.05-1.39)  | 15,615        | 871 | (5.58)   | 70.9                  | 1.07 | (0.97-1.18) | 0.17    | 47.0%          |
| Both                    | 7,750         | 203           | (2.62) | 56.4     | 1.36                  | (1.15-1.60)  | 2,894         | 174 | (6.01)   | 17.0                  | 1.13 | (0.96-1.34) | 0.12    | 58.0%          |
| <b>Stroke</b>           |               |               |        |          |                       |              |               |     |          |                       |      |             |         |                |
| Non-users               | 25,233        | 100           | (0.40) | 136.0    | 1.00                  | (Reference)  | 13,671        | 235 | (1.72)   | 53.9                  | 1.00 | (Reference) |         |                |
| SERMs                   | 55,457        | 215           | (0.39) | 290.1    | 1.46                  | (1.15-1.85)  | 7,009         | 141 | (2.01)   | 27.9                  | 1.11 | (0.90-1.36) | 0.09    | 65.0%          |
| AIs                     | 9,018         | 69            | (0.77) | 49.3     | 1.43                  | (1.05-1.96)  | 19,093        | 268 | (1.40)   | 70.9                  | 1.04 | (0.87-1.24) | 0.08    | 68.0%          |
| Both                    | 7,750         | 38            | (0.49) | 56.4     | 1.42                  | (0.96-2.08)  | 3,618         | 50  | (1.38)   | 17.0                  | 0.99 | (0.73-1.35) | 0.15    | 51.0%          |
| <b>CHD</b>              |               |               |        |          |                       |              |               |     |          |                       |      |             |         |                |
| Non-users               | 25,233        | 191           | (0.76) | 136.0    | 1.00                  | (Reference)  | 13,671        | 223 | (1.63)   | 53.9                  | 1.00 | (Reference) |         |                |
| SERMs                   | 55,457        | 336           | (0.61) | 290.1    | 1.11                  | (0.93-1.34)  | 7,009         | 129 | (1.84)   | 27.9                  | 1.13 | (0.91-1.40) | 0.91    | 0.0%           |
| AIs                     | 9,018         | 106           | (1.18) | 49.3     | 1.22                  | (0.96-1.54)  | 19,093        | 283 | (1.48)   | 70.9                  | 1.13 | (0.94-1.35) | 0.62    | 0.0%           |
| Both                    | 7,750         | 61            | (0.79) | 56.4     | 1.14                  | (0.85-1.53)  | 3,618         | 49  | (1.35)   | 17.0                  | 1.06 | (0.78-1.45) | 0.75    | 0.0%           |
| <b>VTE</b>              |               |               |        |          |                       |              |               |     |          |                       |      |             |         |                |
| Non-users               | 25,233        | 45            | (0.18) | 136.0    | 1.00                  | (Reference)  | 13,671        | 51  | (0.37)   | 53.9                  | 1.00 | (Reference) |         |                |
| SERMs                   | 55,457        | 127           | (0.23) | 290.1    | 1.65                  | (1.17-2.32)  | 7,009         | 27  | (0.39)   | 27.9                  | 1.31 | (0.84-2.05) | 0.43    | 0.0%           |
| AIs                     | 9,018         | 15            | (0.17) | 49.3     | 1.07                  | (0.61-1.89)  | 19,093        | 59  | (0.31)   | 70.9                  | 1.11 | (0.76-1.63) | 0.91    | 0.0%           |
| Both                    | 7,750         | 18            | (0.23) | 56.4     | 1.90                  | (1.08-3.36)  | 3,618         | 17  | (0.47)   | 17.0                  | 1.66 | (0.95-2.90) | 0.73    | 0.0%           |
| <b>HF</b>               |               |               |        |          |                       |              |               |     |          |                       |      |             |         |                |
| Non-users               | 25,233        | 129           | (0.51) | 136.0    | 1.00                  | (Reference)  | 13,671        | 102 | (0.75)   | 53.9                  | 1.00 | (Reference) |         |                |
| SERMs                   | 55,457        | 156           | (0.28) | 290.1    | 0.84                  | (0.66-1.05)  | 7,009         | 50  | (0.71)   | 27.9                  | 1.18 | (0.85-1.65) | 0.09    | 65.0%          |
| AIs                     | 9,018         | 43            | (0.48) | 49.3     | 1.13                  | (0.81-1.58)  | 19,093        | 113 | (0.59)   | 70.9                  | 1.09 | (0.83-1.44) | 0.88    | 0.0%           |
| Both                    | 7,750         | 39            | (0.50) | 56.4     | 1.69                  | (1.16-2.46)  | 3,618         | 21  | (0.58)   | 17.0                  | 1.15 | (0.71-1.85) | 0.22    | 35.0%          |
| <b>Arrhythmia</b>       |               |               |        |          |                       |              |               |     |          |                       |      |             |         |                |
| Non-users               | 25,233        | 135           | (0.54) | 136.0    | 1.00                  | (Reference)  | 13,671        | 128 | (0.94)   | 53.9                  | 1.00 | (Reference) |         |                |
| SERMs                   | 55,457        | 279           | (0.50) | 290.1    | 1.17                  | (0.95-1.44)  | 7,009         | 67  | (0.96)   | 27.9                  | 1.20 | (0.90-1.60) | 0.90    | 0.0%           |
| AIs                     | 9,018         | 55            | (0.61) | 49.3     | 1.08                  | (0.79-1.48)  | 19,093        | 150 | (0.79)   | 70.9                  | 1.03 | (0.81-1.30) | 0.80    | 0.0%           |
| Both                    | 7,750         | 47            | (0.61) | 56.4     | 1.33                  | (0.94-1.87)  | 3,618         | 37  | (1.02)   | 17.0                  | 1.28 | (0.88-1.86) | 0.90    | 0.0%           |

| T2DM      |        |       |        |       |      |             |        |       |        |      |      |             |      |       |
|-----------|--------|-------|--------|-------|------|-------------|--------|-------|--------|------|------|-------------|------|-------|
| Non-users | 25,233 | 808   | (3.20) | 136.0 | 1.00 | (Reference) | 12,648 | 773   | (6.11) | 53.9 | 1.00 | (Reference) |      |       |
| SERMs     | 55,457 | 1,630 | (2.94) | 290.1 | 1.24 | (1.14-1.35) | 6,368  | 506   | (7.95) | 27.9 | 1.41 | (1.26-1.58) | 0.06 | 71.0% |
| AIs       | 9,018  | 440   | (4.88) | 49.3  | 1.13 | (1.01-1.27) | 17,184 | 1,050 | (6.11) | 70.9 | 1.19 | (1.08-1.30) | 0.56 | 0.0%  |
| Both      | 7,750  | 273   | (3.52) | 56.4  | 1.19 | (1.03-1.37) | 3,282  | 204   | (6.22) | 17.0 | 1.21 | (1.04-1.42) | 0.83 | 0.0%  |

AIs, aromatase inhibitors; CHD, coronary heart diseases; CI, confidence intervals; CVD, cardiovascular diseases; HF, heart failure; HR, hazard ratio; PY, person-years; SERMs, selective estrogen receptor modulators; T2DM, type 2 diabetes mellitus; VTE, venous thromboembolism. \*Adjusted for age at diagnosis, income level, region of residence, histological subtype, surgery, chemotherapy, radiotherapy, trastuzumab, hypertension, dyslipidemia, osteoporosis, and T2DM (or CVDs). If the P-value was <0.1 or I<sup>2</sup>>50% in the heterogeneity test, then we hypothesized a significant difference by the stratified factor.

Table S3. The subgroup analyses by age at diagnosis (&lt;60 vs. ≥60 years)

|                         | Age <60years |               |        |          |                       |             | Age ≥60 years |               |        |          |                       |             | P-value | I <sup>2</sup> |
|-------------------------|--------------|---------------|--------|----------|-----------------------|-------------|---------------|---------------|--------|----------|-----------------------|-------------|---------|----------------|
|                         | No. of total | No. of events | (%)    | 1,000 PY | Adjusted HR (95% CI)* |             | No. of total  | No. of events | (%)    | 1,000 PY | Adjusted HR (95% CI)* |             |         |                |
| <b>Composite of CVD</b> |              |               |        |          |                       |             |               |               |        |          |                       |             |         |                |
| Non-users               | 30,348       | 808           | (2.66) | 160.7    | 1.00                  | (Reference) | 6,351         | 531           | (8.36) | 29.3     | 1.00                  | (Reference) |         |                |
| SERMs                   | 57,618       | 1,214         | (2.11) | 300.7    | 1.19                  | (1.08-1.30) | 3,577         | 312           | (8.72) | 17.4     | 1.08                  | (0.94-1.24) | 0.25    | 24.0%          |
| AIs                     | 15,386       | 510           | (3.31) | 78.5     | 1.17                  | (1.05-1.31) | 9,247         | 649           | (7.02) | 41.7     | 1.04                  | (0.92-1.17) | 0.15    | 53.0%          |
| Both                    | 9,009        | 260           | (2.89) | 64.0     | 1.37                  | (1.19-1.59) | 1,635         | 117           | (7.16) | 9.5      | 1.03                  | (0.84-1.26) | 0.02    | 81.0%          |
| <b>Stroke</b>           |              |               |        |          |                       |             |               |               |        |          |                       |             |         |                |
| Non-users               | 30,348       | 150           | (0.49) | 160.7    | 1.00                  | (Reference) | 6,351         | 185           | (2.91) | 29.3     | 1.00                  | (Reference) |         |                |
| SERMs                   | 57,618       | 245           | (0.43) | 300.7    | 1.41                  | (1.14-1.74) | 3,577         | 111           | (3.10) | 17.4     | 1.05                  | (0.83-1.32) | 0.06    | 71.0%          |
| AIs                     | 15,386       | 113           | (0.73) | 78.5     | 1.21                  | (0.95-1.55) | 9,247         | 224           | (2.42) | 41.7     | 1.05                  | (0.86-1.28) | 0.37    | 0.0%           |
| Both                    | 9,009        | 48            | (0.53) | 64.0     | 1.29                  | (0.92-1.79) | 1,635         | 40            | (2.45) | 9.5      | 0.99                  | (0.70-1.40) | 0.28    | 14.0%          |
| <b>CHD</b>              |              |               |        |          |                       |             |               |               |        |          |                       |             |         |                |
| Non-users               | 30,348       | 256           | (0.84) | 160.7    | 1.00                  | (Reference) | 6,351         | 158           | (2.49) | 29.3     | 1.00                  | (Reference) |         |                |
| SERMs                   | 57,618       | 369           | (0.64) | 300.7    | 1.17                  | (0.99-1.38) | 3,577         | 96            | (2.68) | 17.4     | 1.07                  | (0.83-1.37) | 0.54    | 0.0%           |
| AIs                     | 15,386       | 187           | (1.22) | 78.5     | 1.24                  | (1.02-1.50) | 9,247         | 202           | (2.18) | 41.7     | 1.02                  | (0.82-1.26) | 0.19    | 42.0%          |
| Both                    | 9,009        | 78            | (0.87) | 64.0     | 1.24                  | (0.96-1.61) | 1,635         | 32            | (1.96) | 9.5      | 0.93                  | (0.63-1.36) | 0.22    | 34.0%          |
| <b>VTE</b>              |              |               |        |          |                       |             |               |               |        |          |                       |             |         |                |
| Non-users               | 30,348       | 67            | (0.22) | 160.7    | 1.00                  | (Reference) | 6,351         | 29            | (0.46) | 29.3     | 1.00                  | (Reference) |         |                |
| SERMs                   | 57,618       | 137           | (0.24) | 300.7    | 1.49                  | (1.11-2.02) | 3,577         | 17            | (0.48) | 17.4     | 1.40                  | (0.79-2.48) | 0.85    | 0.0%           |
| AIs                     | 15,386       | 30            | (0.19) | 78.5     | 0.98                  | (0.64-1.49) | 9,247         | 44            | (0.48) | 41.7     | 1.38                  | (0.86-2.22) | 0.28    | 14.0%          |
| Both                    | 9,009        | 25            | (0.28) | 64.0     | 1.75                  | (1.09-2.81) | 1,635         | 10            | (0.61) | 9.5      | 1.76                  | (0.85-3.65) | 0.99    | 0.0%           |
| <b>HF</b>               |              |               |        |          |                       |             |               |               |        |          |                       |             |         |                |
| Non-users               | 30,348       | 159           | (0.52) | 160.7    | 1.00                  | (Reference) | 6,351         | 72            | (1.13) | 29.3     | 1.00                  | (Reference) |         |                |
| SERMs                   | 57,618       | 168           | (0.29) | 300.7    | 0.90                  | (0.72-1.11) | 3,577         | 38            | (1.06) | 17.4     | 1.07                  | (0.72-1.58) | 0.44    | 0.0%           |
| AIs                     | 15,386       | 73            | (0.47) | 78.5     | 1.11                  | (0.85-1.47) | 9,247         | 83            | (0.90) | 41.7     | 1.05                  | (0.76-1.46) | 0.80    | 0.0%           |
| Both                    | 9,009        | 47            | (0.52) | 64.0     | 1.67                  | (1.19-2.35) | 1,635         | 13            | (0.80) | 9.5      | 0.97                  | (0.54-1.77) | 0.12    | 58.0%          |
| <b>Arrhythmia</b>       |              |               |        |          |                       |             |               |               |        |          |                       |             |         |                |
| Non-users               | 30,348       | 176           | (0.58) | 160.7    | 1.00                  | (Reference) | 6,351         | 87            | (1.37) | 29.3     | 1.00                  | (Reference) |         |                |
| SERMs                   | 57,618       | 296           | (0.51) | 300.7    | 1.19                  | (0.99-1.44) | 3,577         | 50            | (1.40) | 17.4     | 1.08                  | (0.77-1.53) | 0.63    | 0.0%           |
| AIs                     | 15,386       | 109           | (0.71) | 78.5     | 1.15                  | (0.90-1.47) | 9,247         | 96            | (1.04) | 41.7     | 0.93                  | (0.69-1.25) | 0.27    | 19.0%          |
| Both                    | 9,009        | 62            | (0.69) | 64.0     | 1.38                  | (1.02-1.85) | 1,635         | 22            | (1.35) | 9.5      | 1.09                  | (0.68-1.75) | 0.41    | 0.0%           |

| T2DM      |        |       |        |       |      |             |       |     |        |      |      |             |      |      |
|-----------|--------|-------|--------|-------|------|-------------|-------|-----|--------|------|------|-------------|------|------|
| Non-users | 30,348 | 1,063 | (3.50) | 160.7 | 1.00 | (Reference) | 6,351 | 518 | (8.16) | 29.3 | 1.00 | (Reference) |      |      |
| SERMs     | 57,618 | 1,782 | (3.09) | 300.7 | 1.30 | (1.20-1.41) | 3,577 | 354 | (9.90) | 17.4 | 1.32 | (1.15-1.50) | 0.89 | 0.0% |
| AIs       | 15,386 | 772   | (5.02) | 78.5  | 1.17 | (1.07-1.29) | 9,247 | 718 | (7.76) | 41.7 | 1.11 | (0.99-1.25) | 0.47 | 0.0% |
| Both      | 9,009  | 339   | (3.76) | 64.0  | 1.23 | (1.08-1.39) | 1,635 | 138 | (8.44) | 9.5  | 1.19 | (0.98-1.43) | 0.77 | 0.0% |

AIs, aromatase inhibitors; CHD, coronary heart diseases; CI, confidence intervals; CVD, cardiovascular diseases; HF, heart failure; HR, hazard ratio; PY, person-years; SERMs, selective estrogen receptor modulators; T2DM, type 2 diabetes mellitus; VTE, venous thromboembolism. \*Adjusted for age at diagnosis, income level, region of residence, histological subtype, surgery, chemotherapy, radiotherapy, trastuzumab, hypertension, dyslipidemia, osteoporosis, and T2DM (or CVDs). If the P-value was <0.1 or I<sup>2</sup>>50% in the heterogeneity test, then we hypothesized a significant difference by the stratified factor.

Table S4. The subgroup analyses by age at diagnosis (&lt;55 year; 40-54 and 45-54 years)

|                  | Age 40-54 years |               |        |          |                       | Age 45-54 years |               |        |          |                       |
|------------------|-----------------|---------------|--------|----------|-----------------------|-----------------|---------------|--------|----------|-----------------------|
|                  | No. of total    | No. of events | (%)    | 1,000 PY | Adjusted HR (95% CI)* | No. of total    | No. of events | (%)    | 1,000 PY | Adjusted HR (95% CI)* |
| Composite of CVD |                 |               |        |          |                       |                 |               |        |          |                       |
| Non-users        | 19,175          | 515           | (2.69) | 101.8    | 1.00 (Reference)      | 14,022          | 414           | (2.95) | 74.5     | 1.00 (Reference)      |
| SERMs            | 43,755          | 938           | (2.14) | 223.1    | 1.18 (1.05-1.31)      | 26,938          | 665           | (2.47) | 133.2    | 1.24 (1.09-1.40)      |
| AIs              | 8,928           | 288           | (3.23) | 48.8     | 1.19 (1.03-1.37)      | 8,671           | 279           | (3.22) | 47.1     | 1.20 (1.04-1.40)      |
| Both             | 7,143           | 192           | (2.69) | 52.2     | 1.33 (1.12-1.57)      | 5,877           | 163           | (2.77) | 42.6     | 1.31 (1.09-1.58)      |
| Stroke           |                 |               |        |          |                       |                 |               |        |          |                       |
| Non-users        | 19,175          | 90            | (0.47) | 101.8    | 1.00 (Reference)      | 14,022          | 75            | (0.53) | 74.5     | 1.00 (Reference)      |
| SERMs            | 43,755          | 186           | (0.43) | 223.1    | 1.48 (1.14-1.91)      | 26,938          | 140           | (0.52) | 133.2    | 1.60 (1.20-2.13)      |
| AIs              | 8,928           | 69            | (0.77) | 48.8     | 1.39 (1.01-1.91)      | 8,671           | 66            | (0.76) | 47.1     | 1.40 (1.00-1.96)      |
| Both             | 7,143           | 36            | (0.50) | 52.2     | 1.37 (0.92-2.04)      | 5,877           | 33            | (0.56) | 42.6     | 1.44 (0.94-2.19)      |
| CHD              |                 |               |        |          |                       |                 |               |        |          |                       |
| Non-users        | 19,175          | 178           | (0.93) | 101.8    | 1.00 (Reference)      | 14,022          | 156           | (1.11) | 74.5     | 1.00 (Reference)      |
| SERMs            | 43,755          | 303           | (0.69) | 223.1    | 1.08 (0.89-1.31)      | 26,938          | 220           | (0.82) | 133.2    | 1.02 (0.82-1.26)      |
| AIs              | 8,928           | 106           | (1.19) | 48.8     | 1.21 (0.95-1.54)      | 8,671           | 104           | (1.20) | 47.1     | 1.19 (0.93-1.52)      |
| Both             | 7,143           | 60            | (0.84) | 52.2     | 1.13 (0.84-1.53)      | 5,877           | 55            | (0.94) | 42.6     | 1.12 (0.82-1.54)      |
| VTE              |                 |               |        |          |                       |                 |               |        |          |                       |
| Non-users        | 19,175          | 35            | (0.18) | 101.8    | 1.00 (Reference)      | 14,022          | 25            | (0.18) | 74.5     | 1.00 (Reference)      |
| SERMs            | 43,755          | 101           | (0.23) | 223.1    | 1.76 (1.18-2.62)      | 26,938          | 71            | (0.26) | 133.2    | 2.05 (1.28-3.29)      |
| AIs              | 8,928           | 15            | (0.17) | 48.8     | 1.05 (0.58-1.89)      | 8,671           | 15            | (0.17) | 47.1     | 1.27 (0.68-2.38)      |
| Both             | 7,143           | 15            | (0.21) | 52.2     | 1.69 (0.91-3.16)      | 5,877           | 13            | (0.22) | 42.6     | 2.05 (1.02-4.11)      |
| HF               |                 |               |        |          |                       |                 |               |        |          |                       |
| Non-users        | 19,175          | 102           | (0.53) | 101.8    | 1.00 (Reference)      | 14,022          | 80            | (0.57) | 74.5     | 1.00 (Reference)      |
| SERMs            | 43,755          | 119           | (0.27) | 223.1    | 0.83 (0.64-1.08)      | 26,938          | 78            | (0.29) | 133.2    | 0.89 (0.65-1.22)      |
| AIs              | 8,928           | 43            | (0.48) | 48.8     | 1.10 (0.78-1.56)      | 8,671           | 40            | (0.46) | 47.1     | 1.01 (0.70-1.45)      |
| Both             | 7,143           | 36            | (0.50) | 52.2     | 1.63 (1.10-2.43)      | 5,877           | 24            | (0.41) | 42.6     | 1.31 (0.81-2.11)      |
| Arrhythmia       |                 |               |        |          |                       |                 |               |        |          |                       |
| Non-users        | 19,175          | 110           | (0.57) | 101.8    | 1.00 (Reference)      | 14,022          | 78            | (0.56) | 74.5     | 1.00 (Reference)      |
| SERMs            | 43,755          | 229           | (0.52) | 223.1    | 1.20 (0.95-1.52)      | 26,938          | 156           | (0.58) | 133.2    | 1.40 (1.06-1.84)      |
| AIs              | 8,928           | 55            | (0.62) | 48.8     | 1.08 (0.78-1.50)      | 8,671           | 54            | (0.62) | 47.1     | 1.21 (0.85-1.72)      |



|           |        |       |        |       |                  |        |       |        |       |                  |
|-----------|--------|-------|--------|-------|------------------|--------|-------|--------|-------|------------------|
| Both      | 7,143  | 45    | (0.63) | 52.2  | 1.34 (0.94-1.91) | 5,877  | 38    | (0.65) | 42.6  | 1.42 (0.96-2.12) |
| T2DM      |        |       |        |       |                  |        |       |        |       |                  |
| Non-users | 19,175 | 726   | (3.79) | 101.8 | 1.00 (Reference) | 14,022 | 589   | (4.20) | 74.5  | 1.00 (Reference) |
| SERMs     | 43,755 | 1,429 | (3.27) | 223.1 | 1.22 (1.12-1.34) | 26,938 | 1,022 | (3.79) | 133.2 | 1.28 (1.16-1.42) |
| AIs       | 8,928  | 439   | (4.92) | 48.8  | 1.14 (1.01-1.28) | 8,671  | 425   | (4.90) | 47.1  | 1.14 (1.00-1.29) |
| Both      | 7,143  | 264   | (3.70) | 52.2  | 1.18 (1.02-1.36) | 5,877  | 232   | (3.95) | 42.6  | 1.19 (1.02-1.39) |

AIs, aromatase inhibitors; CHD, coronary heart diseases; CI, confidence intervals; CVD, cardiovascular diseases; HF, heart failure; HR, hazard ratio; PY, person-years; SERMs, selective estrogen receptor modulators; T2DM, type 2 diabetes mellitus; VTE, venous thromboembolism. \*Adjusted for age at diagnosis, income level, region of residence, histological subtype, surgery, chemotherapy, radiotherapy, trastuzumab, hypertension, dyslipidemia, osteoporosis, and T2DM (or CVDs).

Table S5. The subgroup analyses by age at diagnosis (<60 years;40-59 and 45-59 years)

|                  | Age 40-59 years |               |        |          |                       |             | Age 45-59 years |               |        |          |                       |             |
|------------------|-----------------|---------------|--------|----------|-----------------------|-------------|-----------------|---------------|--------|----------|-----------------------|-------------|
|                  | No. of total    | No. of events | (%)    | 1,000 PY | Adjusted HR (95% CI)* |             | No. of total    | No. of events | (%)    | 1,000 PY | Adjusted HR (95% CI)* |             |
| Composite of CVD |                 |               |        |          |                       |             |                 |               |        |          |                       |             |
| Non-users        | 24,290          | 723           | (2.98) | 126.5    | 1.00                  | (Reference) | 19,137          | 622           | (3.25) | 74.5     | 1.00                  | (Reference) |
| SERMs            | 45,916          | 1,039         | (2.26) | 233.6    | 1.21                  | (1.09-1.33) | 29,099          | 766           | (2.63) | 133.2    | 1.26                  | (1.13-1.41) |
| AIs              | 15,296          | 510           | (3.33) | 78.0     | 1.16                  | (1.04-1.30) | 15,039          | 501           | (3.33) | 47.1     | 1.17                  | (1.04-1.32) |
| Both             | 8,402           | 249           | (2.96) | 59.8     | 1.35                  | (1.17-1.57) | 7,136           | 220           | (3.08) | 42.6     | 1.34                  | (1.15-1.57) |
| Stroke           |                 |               |        |          |                       |             |                 |               |        |          |                       |             |
| Non-users        | 24,290          | 140           | (0.58) | 126.5    | 1.00                  | (Reference) | 19,137          | 125           | (0.65) | 74.5     | 1.00                  | (Reference) |
| SERMs            | 45,916          | 216           | (0.47) | 233.6    | 1.41                  | (1.13-1.76) | 29,099          | 170           | (0.58) | 133.2    | 1.48                  | (1.16-1.88) |
| AIs              | 15,296          | 113           | (0.74) | 78.0     | 1.19                  | (0.93-1.53) | 15,039          | 110           | (0.73) | 47.1     | 1.20                  | (0.93-1.55) |
| Both             | 8,402           | 46            | (0.55) | 59.8     | 1.25                  | (0.89-1.76) | 7,136           | 43            | (0.60) | 42.6     | 1.27                  | (0.89-1.81) |
| CHD              |                 |               |        |          |                       |             |                 |               |        |          |                       |             |
| Non-users        | 24,290          | 243           | (1.00) | 126.5    | 1.00                  | (Reference) | 19,137          | 221           | (1.15) | 74.5     | 1.00                  | (Reference) |
| SERMs            | 45,916          | 336           | (0.73) | 233.6    | 1.13                  | (0.95-1.34) | 29,099          | 253           | (0.87) | 133.2    | 1.08                  | (0.90-1.31) |
| AIs              | 15,296          | 187           | (1.22) | 78.0     | 1.24                  | (1.02-1.51) | 15,039          | 185           | (1.23) | 47.1     | 1.23                  | (1.01-1.50) |
| Both             | 8,402           | 77            | (0.92) | 59.8     | 1.22                  | (0.94-1.59) | 7,136           | 72            | (1.01) | 42.6     | 1.21                  | (0.92-1.59) |
| VTE              |                 |               |        |          |                       |             |                 |               |        |          |                       |             |
| Non-users        | 24,290          | 57            | (0.23) | 126.5    | 1.00                  | (Reference) | 19,137          | 47            | (0.25) | 74.5     | 1.00                  | (Reference) |
| SERMs            | 45,916          | 111           | (0.24) | 233.6    | 1.60                  | (1.14-2.24) | 29,099          | 81            | (0.28) | 133.2    | 1.75                  | (1.20-2.55) |
| AIs              | 15,296          | 30            | (0.20) | 78.0     | 0.94                  | (0.61-1.45) | 15,039          | 30            | (0.20) | 47.1     | 1.02                  | (0.65-1.60) |
| Both             | 8,402           | 22            | (0.26) | 59.8     | 1.63                  | (0.98-2.71) | 7,136           | 20            | (0.28) | 42.6     | 1.82                  | (1.06-3.13) |
| HF               |                 |               |        |          |                       |             |                 |               |        |          |                       |             |
| Non-users        | 24,290          | 132           | (0.54) | 126.5    | 1.00                  | (Reference) | 19,137          | 110           | (0.57) | 74.5     | 1.00                  | (Reference) |
| SERMs            | 45,916          | 131           | (0.29) | 233.6    | 0.91                  | (0.71-1.17) | 29,099          | 90            | (0.31) | 133.2    | 1.00                  | (0.75-1.33) |
| AIs              | 15,296          | 73            | (0.48) | 78.0     | 1.10                  | (0.83-1.46) | 15,039          | 70            | (0.47) | 47.1     | 1.05                  | (0.78-1.42) |
| Both             | 8,402           | 44            | (0.52) | 59.8     | 1.64                  | (1.15-2.33) | 7,136           | 32            | (0.45) | 42.6     | 1.39                  | (0.92-2.10) |
| Arrhythmia       |                 |               |        |          |                       |             |                 |               |        |          |                       |             |
| Non-users        | 24,290          | 151           | (0.62) | 126.5    | 1.00                  | (Reference) | 19,137          | 119           | (0.62) | 74.5     | 1.00                  | (Reference) |
| SERMs            | 45,916          | 246           | (0.54) | 233.6    | 1.24                  | (1.01-1.53) | 29,099          | 173           | (0.59) | 133.2    | 1.43                  | (1.12-1.81) |
| AIs              | 15,296          | 109           | (0.71) | 78.0     | 1.15                  | (0.90-1.48) | 15,039          | 108           | (0.72) | 47.1     | 1.23                  | (0.94-1.60) |
| Both             | 8,402           | 60            | (0.71) | 59.8     | 1.41                  | (1.04-1.91) | 7,136           | 53            | (0.74) | 42.6     | 1.49                  | (1.07-2.08) |
| T2DM             |                 |               |        |          |                       |             |                 |               |        |          |                       |             |

|           |        |       |        |       |      |             |        |       |        |       |      |             |
|-----------|--------|-------|--------|-------|------|-------------|--------|-------|--------|-------|------|-------------|
| Non-users | 24,290 | 981   | (4.04) | 126.5 | 1.00 | (Reference) | 19,137 | 844   | (4.41) | 74.5  | 1.00 | (Reference) |
| SERMs     | 45,916 | 1,581 | (3.44) | 233.6 | 1.28 | (1.18-1.39) | 29,099 | 1,174 | (4.03) | 133.2 | 1.34 | (1.22-1.47) |
| AIs       | 15,296 | 771   | (5.04) | 78.0  | 1.18 | (1.08-1.30) | 15,039 | 757   | (5.03) | 47.1  | 1.19 | (1.08-1.32) |
| Both      | 8,402  | 330   | (3.93) | 59.8  | 1.21 | (1.06-1.37) | 7,136  | 298   | (4.18) | 42.6  | 1.21 | (1.06-1.39) |

AIs, aromatase inhibitors; CHD, coronary heart diseases; CI, confidence intervals; CVD, cardiovascular diseases; HF, heart failure; HR, hazard ratio; PY, person-years; SERMs, selective estrogen receptor modulators; T2DM, type 2 diabetes mellitus; VTE, venous thromboembolism. \*Adjusted for age at diagnosis, income level, region of residence, histological subtype, surgery, chemotherapy, radiotherapy, trastuzumab, hypertension, dyslipidemia, osteoporosis, and T2DM (or CVDs).

Table S6. The subgroup analysis by histological types

|                         | Invasive     |               |        |          |                       |             | <i>In situ</i> |               |        |          |                       |              | P-value | I <sup>2</sup> |
|-------------------------|--------------|---------------|--------|----------|-----------------------|-------------|----------------|---------------|--------|----------|-----------------------|--------------|---------|----------------|
|                         | No. of total | No. of events | (%)    | 1,000 PY | Adjusted HR (95% CI)* |             | No. of total   | No. of events | (%)    | 1,000 PY | Adjusted HR (95% CI)* |              |         |                |
| <b>Composite of CVD</b> |              |               |        |          |                       |             |                |               |        |          |                       |              |         |                |
| Non-users               | 33,252       | 1,251         | (3.76) | 173.1    | 1.00                  | (Reference) | 3,447          | 88            | (2.55) | 16.9     | 1.00                  | (Reference)  |         |                |
| SERMs                   | 52,004       | 1,324         | (2.55) | 275.2    | 1.12                  | (1.04-1.22) | 9,191          | 202           | (2.20) | 42.8     | 1.09                  | (0.84-1.41)  | 0.82    | 0.0%           |
| AIs                     | 24,530       | 1,156         | (4.71) | 119.7    | 1.14                  | (1.05-1.23) | 103            | 3             | (2.91) | 0.5      | 2.93                  | (1.51-5.68)  | <0.01   | 87.0%          |
| Both                    | 10,459       | 369           | (3.53) | 72.2     | 1.25                  | (1.11-1.40) | 185            | 8             | (4.32) | 1.2      | 1.08                  | (0.52-2.26)  | 0.71    | 0.0%           |
| <b>Stroke</b>           |              |               |        |          |                       |             |                |               |        |          |                       |              |         |                |
| Non-users               | 33,252       | 311           | (0.94) | 173.1    | 1.00                  | (Reference) | 3,447          | 24            | (0.70) | 16.9     | 1.00                  | (Reference)  |         |                |
| SERMs                   | 52,004       | 309           | (0.59) | 275.2    | 1.21                  | (1.04-1.42) | 9,191          | 47            | (0.51) | 42.8     | 1.07                  | (0.64-1.78)  | 0.64    | 0.0%           |
| AIs                     | 24,530       | 336           | (1.37) | 119.7    | 1.17                  | (1.00-1.37) | 103            | 1             | (0.97) | 0.5      | 1.82                  | (0.43-7.75)  | 0.55    | 0.0%           |
| Both                    | 10,459       | 86            | (0.82) | 72.2     | 1.14                  | (0.90-1.46) | 185            | 2             | (1.08) | 1.2      | 0.79                  | (0.18-3.41)  | 0.62    | 0.0%           |
| <b>CHD</b>              |              |               |        |          |                       |             |                |               |        |          |                       |              |         |                |
| Non-users               | 33,252       | 377           | (1.13) | 173.1    | 1.00                  | (Reference) | 3,447          | 37            | (1.07) | 16.9     | 1.00                  | (Reference)  |         |                |
| SERMs                   | 52,004       | 397           | (0.76) | 275.2    | 1.05                  | (0.91-1.21) | 9,191          | 68            | (0.74) | 42.8     | 0.84                  | (0.55-1.27)  | 0.32    | 0.0%           |
| AIs                     | 24,530       | 388           | (1.58) | 119.7    | 1.24                  | (1.07-1.43) | 103            | 1             | (0.97) | 0.5      | 2.02                  | (0.61-6.68)  | 0.43    | 0.0%           |
| Both                    | 10,459       | 108           | (1.03) | 72.2     | 1.18                  | (0.95-1.47) | 185            | 2             | (1.08) | 1.2      | 0.63                  | (0.15-2.65)  | 0.40    | 0.0%           |
| <b>VTE</b>              |              |               |        |          |                       |             |                |               |        |          |                       |              |         |                |
| Non-users               | 33,252       | 90            | (0.27) | 173.1    | 1.00                  | (Reference) | 3,447          | 6             | (0.17) | 16.9     | 1.00                  | (Reference)  |         |                |
| SERMs                   | 52,004       | 137           | (0.26) | 275.2    | 1.47                  | (1.12-1.93) | 9,191          | 17            | (0.18) | 42.8     | 1.35                  | (0.51-3.56)  | 0.86    | 0.0%           |
| AIs                     | 24,530       | 74            | (0.30) | 119.7    | 1.16                  | (0.85-1.58) | 103            | 0             | 0.00   | 0.5      | 4.47                  | (0.49-40.62) | 0.23    | 29.0%          |
| Both                    | 10,459       | 34            | (0.33) | 72.2     | 1.70                  | (1.13-2.54) | 185            | 1             | (0.54) | 1.2      | 2.78                  | (0.31-24.83) | 0.66    | 0.0%           |
| <b>HF</b>               |              |               |        |          |                       |             |                |               |        |          |                       |              |         |                |
| Non-users               | 33,252       | 225           | (0.68) | 173.1    | 1.00                  | (Reference) | 3,447          | 6             | (0.17) | 16.9     | 1.00                  | (Reference)  |         |                |
| SERMs                   | 52,004       | 191           | (0.37) | 275.2    | 0.95                  | (0.78-1.16) | 9,191          | 15            | (0.16) | 42.8     | 1.37                  | (0.52-3.62)  | 0.48    | 0.0%           |
| AIs                     | 24,530       | 155           | (0.63) | 119.7    | 1.03                  | (0.84-1.27) | 103            | 1             | (0.97) | 0.5      | 11.86                 | (2.89-48.67) | <0.01   | 91.0%          |
| Both                    | 10,459       | 58            | (0.55) | 72.2     | 1.38                  | (1.02-1.85) | 185            | 2             | (1.08) | 1.2      | 4.19                  | (0.81-21.78) | 0.19    | 41.0%          |
| <b>Arrhythmia</b>       |              |               |        |          |                       |             |                |               |        |          |                       |              |         |                |
| Non-users               | 33,252       | 248           | (0.75) | 173.1    | 1.00                  | (Reference) | 3,447          | 15            | (0.44) | 16.9     | 1.00                  | (Reference)  |         |                |
| SERMs                   | 52,004       | 291           | (0.56) | 275.2    | 1.11                  | (0.93-1.31) | 9,191          | 55            | (0.60) | 42.8     | 1.54                  | (0.86-2.77)  | 0.29    | 12.0%          |
| AIs                     | 24,530       | 205           | (0.84) | 119.7    | 1.06                  | (0.88-1.27) | 103            | 0             | 0.00   | 0.5      | 2.40                  | (0.31-18.38) | 0.43    | 0.0%           |
| Both                    | 10,459       | 83            | (0.79) | 72.2     | 1.26                  | (0.98-1.62) | 185            | 1             | (0.54) | 1.2      | 1.12                  | (0.15-8.65)  | 0.91    | 0.0%           |

| T2DM      |        |       |        |       |      |             |       |     |        |      |      |             |       |       |
|-----------|--------|-------|--------|-------|------|-------------|-------|-----|--------|------|------|-------------|-------|-------|
| Non-users | 33,252 | 1,469 | (4.42) | 173.1 | 1.00 | (Reference) | 3,447 | 112 | (3.25) | 16.9 | 1.00 | (Reference) |       |       |
| SERMs     | 52,004 | 1,857 | (3.57) | 275.2 | 1.22 | (1.14-1.31) | 9,191 | 279 | (3.04) | 42.8 | 1.14 | (0.91-1.43) | 0.57  | 0.0%  |
| AIs       | 24,530 | 1,484 | (6.05) | 119.7 | 1.22 | (1.14-1.32) | 103   | 6   | (5.83) | 0.5  | 3.03 | (1.62-5.66) | <0.01 | 87.0% |
| Both      | 10,459 | 468   | (4.47) | 72.2  | 1.25 | (1.12-1.39) | 185   | 9   | (4.86) | 1.2  | 1.03 | (0.52-2.06) | 0.60  | 0.0%  |

AIs, aromatase inhibitors; CHD, coronary heart diseases; CI, confidence intervals; CVD, cardiovascular diseases; HF, heart failure; HR, hazard ratio; PY, person-years; SERMs, selective estrogen receptor modulators; T2DM, type 2 diabetes mellitus; VTE, venous thromboembolism. \*Adjusted for age at diagnosis, income level, region of residence, surgery, chemotherapy, radiotherapy, trastuzumab, hypertension, dyslipidemia, osteoporosis, and T2DM (or CVDs). If the P-value was <0.1 or I<sup>2</sup>>50% in the heterogeneity test, then we hypothesized a significant difference by the stratified factor.

Table S7. The subgroup analysis by surgery

|                         | No surgery   |               |        |          |                       |              | Surgery       |       |          |                       |      |             | P-value | I <sup>2</sup> |
|-------------------------|--------------|---------------|--------|----------|-----------------------|--------------|---------------|-------|----------|-----------------------|------|-------------|---------|----------------|
|                         | No. of total | No. of events | (%)    | 1,000 PY | Adjusted HR (95% CI)* | No. of total | No. of events | (%)   | 1,000 PY | Adjusted HR (95% CI)* |      |             |         |                |
| <b>Composite of CVD</b> |              |               |        |          |                       |              |               |       |          |                       |      |             |         |                |
| Non-users               | 7,004        | 405           | (5.78) | 38.1     | 1.00                  | (Reference)  | 29,695        | 934   | (3.15)   | 151.8                 | 1.00 | (Reference) |         |                |
| SERMs                   | 7,087        | 274           | (3.87) | 41.2     | 1.03                  | (0.88-1.20)  | 54,108        | 1,252 | (2.31)   | 276.8                 | 1.19 | (1.09-1.29) | 0.12    | 59.0%          |
| AIs                     | 2,587        | 161           | (6.22) | 13.9     | 1.10                  | (0.92-1.31)  | 22,046        | 998   | (4.53)   | 106.3                 | 1.16 | (1.06-1.27) | 0.58    | 0.0%           |
| Both                    | 1,613        | 88            | (5.46) | 11.2     | 1.26                  | (0.99-1.59)  | 9,031         | 289   | (3.20)   | 62.2                  | 1.25 | (1.09-1.43) | 0.97    | 0.0%           |
| <b>Stroke</b>           |              |               |        |          |                       |              |               |       |          |                       |      |             |         |                |
| Non-users               | 7,004        | 129           | (1.84) | 38.1     | 1.00                  | (Reference)  | 29,695        | 206   | (0.69)   | 151.8                 | 1.00 | (Reference) |         |                |
| SERMs                   | 7,087        | 74            | (1.04) | 41.2     | 0.92                  | (0.69-1.22)  | 54,108        | 282   | (0.52)   | 276.8                 | 1.40 | (1.17-1.68) | 0.02    | 83.0%          |
| AIs                     | 2,587        | 48            | (1.86) | 13.9     | 0.87                  | (0.62-1.20)  | 22,046        | 289   | (1.31)   | 106.3                 | 1.30 | (1.08-1.55) | 0.03    | 78.0%          |
| Both                    | 1,613        | 21            | (1.30) | 11.2     | 0.96                  | (0.60-1.53)  | 9,031         | 67    | (0.74)   | 62.2                  | 1.25 | (0.95-1.66) | 0.33    | 0.0%           |
| <b>CHD</b>              |              |               |        |          |                       |              |               |       |          |                       |      |             |         |                |
| Non-users               | 7,004        | 127           | (1.81) | 38.1     | 1.00                  | (Reference)  | 29,695        | 287   | (0.97)   | 151.8                 | 1.00 | (Reference) |         |                |
| SERMs                   | 7,087        | 97            | (1.37) | 41.2     | 1.12                  | (0.86-1.46)  | 54,108        | 368   | (0.68)   | 276.8                 | 1.03 | (0.88-1.21) | 0.61    | 0.0%           |
| AIs                     | 2,587        | 61            | (2.36) | 13.9     | 1.37                  | (1.01-1.86)  | 22,046        | 328   | (1.49)   | 106.3                 | 1.20 | (1.03-1.42) | 0.47    | 0.0%           |
| Both                    | 1,613        | 25            | (1.55) | 11.2     | 1.12                  | (0.73-1.74)  | 9,031         | 85    | (0.94)   | 62.2                  | 1.16 | (0.91-1.49) | 0.90    | 0.0%           |
| <b>VTE</b>              |              |               |        |          |                       |              |               |       |          |                       |      |             |         |                |
| Non-users               | 7,004        | 33            | (0.47) | 38.1     | 1.00                  | (Reference)  | 29,695        | 63    | (0.21)   | 151.8                 | 1.00 | (Reference) |         |                |
| SERMs                   | 7,087        | 20            | (0.28) | 41.2     | 0.96                  | (0.56-1.64)  | 54,108        | 134   | (0.25)   | 276.8                 | 1.70 | (1.25-2.32) | 0.07    | 70.0%          |
| AIs                     | 2,587        | 10            | (0.39) | 13.9     | 1.12                  | (0.59-2.12)  | 22,046        | 64    | (0.29)   | 106.3                 | 1.22 | (0.86-1.74) | 0.82    | 0.0%           |
| Both                    | 1,613        | 11            | (0.68) | 11.2     | 1.98                  | (0.98-4.03)  | 9,031         | 24    | (0.27)   | 62.2                  | 1.65 | (1.02-2.67) | 0.67    | 0.0%           |
| <b>HF</b>               |              |               |        |          |                       |              |               |       |          |                       |      |             |         |                |
| Non-users               | 7,004        | 51            | (0.73) | 38.1     | 1.00                  | (Reference)  | 29,695        | 180   | (0.61)   | 151.8                 | 1.00 | (Reference) |         |                |
| SERMs                   | 7,087        | 29            | (0.41) | 41.2     | 0.86                  | (0.55-1.34)  | 54,108        | 177   | (0.33)   | 276.8                 | 1.00 | (0.81-1.23) | 0.56    | 0.0%           |
| AIs                     | 2,587        | 22            | (0.85) | 13.9     | 1.22                  | (0.75-1.99)  | 22,046        | 134   | (0.61)   | 106.3                 | 1.03 | (0.82-1.28) | 0.52    | 0.0%           |
| Both                    | 1,613        | 12            | (0.74) | 11.2     | 1.38                  | (0.72-2.64)  | 9,031         | 48    | (0.53)   | 62.2                  | 1.41 | (1.02-1.96) | 0.95    | 0.0%           |
| <b>Arrhythmia</b>       |              |               |        |          |                       |              |               |       |          |                       |      |             |         |                |
| Non-users               | 7,004        | 65            | (0.93) | 38.1     | 1.00                  | (Reference)  | 29,695        | 198   | (0.67)   | 151.8                 | 1.00 | (Reference) |         |                |
| SERMs                   | 7,087        | 54            | (0.76) | 41.2     | 1.22                  | (0.85-1.74)  | 54,108        | 292   | (0.54)   | 276.8                 | 1.15 | (0.96-1.39) | 0.80    | 0.0%           |
| AIs                     | 2,587        | 20            | (0.77) | 13.9     | 1.02                  | (0.63-1.63)  | 22,046        | 185   | (0.84)   | 106.3                 | 1.10 | (0.90-1.35) | 0.76    | 0.0%           |
| Both                    | 1,613        | 19            | (1.18) | 11.2     | 1.70                  | (1.00-2.87)  | 9,031         | 65    | (0.72)   | 62.2                  | 1.21 | (0.91-1.61) | 0.27    | 19.0%          |

| T2DM      |       |     |        |      |      |             |        |       |        |       |      |             |      |       |
|-----------|-------|-----|--------|------|------|-------------|--------|-------|--------|-------|------|-------------|------|-------|
| Non-users | 7,004 | 423 | (6.04) | 38.1 | 1.00 | (Reference) | 29,695 | 1,158 | (3.90) | 151.8 | 1.00 | (Reference) |      |       |
| SERMs     | 7,087 | 377 | (5.32) | 41.2 | 1.21 | (1.05-1.39) | 54,108 | 1,759 | (3.25) | 276.8 | 1.25 | (1.16-1.35) | 0.64 | 0.0%  |
| AIs       | 2,587 | 213 | (8.23) | 13.9 | 1.31 | (1.11-1.55) | 22,046 | 1,277 | (5.79) | 106.3 | 1.21 | (1.12-1.31) | 0.42 | 0.0%  |
| Both      | 1,613 | 85  | (5.27) | 11.2 | 1.07 | (0.85-1.36) | 9,031  | 392   | (4.34) | 62.2  | 1.30 | (1.16-1.46) | 0.16 | 50.0% |

AIs, aromatase inhibitors; CHD, coronary heart diseases; CI, confidence intervals; CVD, cardiovascular diseases; HF, heart failure; HR, hazard ratio; PY, person-years; SERMs, selective estrogen receptor modulators; T2DM, type 2 diabetes mellitus; VTE, venous thromboembolism. \*Adjusted for age at diagnosis, income level, region of residence, histological subtype, chemotherapy, radiotherapy, trastuzumab, hypertension, dyslipidemia, osteoporosis, and T2DM (or CVDs). If the P-value was <0.1 or I<sup>2</sup>>50% in the heterogeneity test, then we hypothesized a significant difference by the stratified factor.

Table S8. The subgroup analysis by chemotherapy

|                         | No chemotherapy |               |        |          |                       |              | Chemotherapy  |        |          |                       |       |       | P-value | I <sup>2</sup> |
|-------------------------|-----------------|---------------|--------|----------|-----------------------|--------------|---------------|--------|----------|-----------------------|-------|-------|---------|----------------|
|                         | No. of total    | No. of events | (%)    | 1,000 PY | Adjusted HR (95% CI)* | No. of total | No. of events | (%)    | 1,000 PY | Adjusted HR (95% CI)* |       |       |         |                |
| <b>Composite of CVD</b> |                 |               |        |          |                       |              |               |        |          |                       |       |       |         |                |
| Non-users               | 11,404          | 539           | (4.73) | 61.2     | 1.00 (Reference)      | 25,295       | 800           | (3.16) | 128.8    | 1.00 (Reference)      |       |       |         |                |
| SERMs                   | 27,663          | 701           | (2.53) | 137.9    | 1.07 (0.96-1.21)      | 33,532       | 825           | (2.46) | 180.1    | 1.17 (1.06-1.29)      | 0.29  | 11.0% |         |                |
| AIs                     | 8,575           | 433           | (5.05) | 39.5     | 1.06 (0.92-1.21)      | 16,058       | 726           | (4.52) | 80.6     | 1.19 (1.08-1.32)      | 0.16  | 50.0% |         |                |
| Both                    | 2,748           | 143           | (5.20) | 18.1     | 1.28 (1.06-1.55)      | 7,896        | 234           | (2.96) | 55.4     | 1.23 (1.06-1.43)      | 0.76  | 0.0%  |         |                |
| <b>Stroke</b>           |                 |               |        |          |                       |              |               |        |          |                       |       |       |         |                |
| Non-users               | 11,404          | 169           | (1.48) | 61.2     | 1.00 (Reference)      | 25,295       | 166           | (0.66) | 128.8    | 1.00 (Reference)      |       |       |         |                |
| SERMs                   | 27,663          | 170           | (0.61) | 137.9    | 0.94 (0.76-1.17)      | 33,532       | 186           | (0.55) | 180.1    | 1.50 (1.21-1.85)      | <0.01 | 89.0% |         |                |
| AIs                     | 8,575           | 151           | (1.76) | 39.5     | 1.03 (0.81-1.29)      | 16,058       | 186           | (1.16) | 80.6     | 1.27 (1.03-1.56)      | 0.18  | 45.0% |         |                |
| Both                    | 2,748           | 35            | (1.27) | 18.1     | 0.96 (0.67-1.40)      | 7,896        | 53            | (0.67) | 55.4     | 1.29 (0.94-1.77)      | 0.24  | 28.0% |         |                |
| <b>CHD</b>              |                 |               |        |          |                       |              |               |        |          |                       |       |       |         |                |
| Non-users               | 11,404          | 183           | (1.60) | 61.2     | 1.00 (Reference)      | 25,295       | 231           | (0.91) | 128.8    | 1.00 (Reference)      |       |       |         |                |
| SERMs                   | 27,663          | 237           | (0.86) | 137.9    | 0.99 (0.81-1.21)      | 33,532       | 228           | (0.68) | 180.1    | 1.11 (0.92-1.34)      | 0.41  | 0.0%  |         |                |
| AIs                     | 8,575           | 155           | (1.81) | 39.5     | 1.16 (0.92-1.47)      | 16,058       | 234           | (1.46) | 80.6     | 1.25 (1.04-1.50)      | 0.63  | 0.0%  |         |                |
| Both                    | 2,748           | 47            | (1.71) | 18.1     | 1.27 (0.92-1.77)      | 7,896        | 63            | (0.80) | 55.4     | 1.09 (0.82-1.45)      | 0.49  | 0.0%  |         |                |
| <b>VTE</b>              |                 |               |        |          |                       |              |               |        |          |                       |       |       |         |                |
| Non-users               | 11,404          | 38            | (0.33) | 61.2     | 1.00 (Reference)      | 25,295       | 58            | (0.23) | 128.8    | 1.00 (Reference)      |       |       |         |                |
| SERMs                   | 27,663          | 66            | (0.24) | 137.9    | 1.08 (0.74-1.56)      | 33,532       | 88            | (0.26) | 180.1    | 1.59 (1.13-2.23)      | 0.13  | 57.0% |         |                |
| AIs                     | 8,575           | 22            | (0.26) | 39.5     | 0.84 (0.55-1.29)      | 16,058       | 52            | (0.32) | 80.6     | 1.28 (0.88-1.86)      | 0.15  | 52.0% |         |                |
| Both                    | 2,748           | 12            | (0.44) | 18.1     | 1.02 (0.55-1.89)      | 7,896        | 23            | (0.29) | 55.4     | 1.73 (1.06-2.84)      | 0.19  | 42.0% |         |                |
| <b>HF</b>               |                 |               |        |          |                       |              |               |        |          |                       |       |       |         |                |
| Non-users               | 11,404          | 56            | (0.49) | 61.2     | 1.00 (Reference)      | 25,295       | 175           | (0.69) | 128.8    | 1.00 (Reference)      |       |       |         |                |
| SERMs                   | 27,663          | 67            | (0.24) | 137.9    | 1.08 (0.74-1.56)      | 33,532       | 139           | (0.41) | 180.1    | 0.87 (0.70-1.09)      | 0.34  | 0.0%  |         |                |
| AIs                     | 8,575           | 37            | (0.43) | 39.5     | 0.84 (0.55-1.29)      | 16,058       | 119           | (0.74) | 80.6     | 1.18 (0.93-1.49)      | 0.18  | 44.0% |         |                |
| Both                    | 2,748           | 13            | (0.47) | 18.1     | 1.02 (0.55-1.89)      | 7,896        | 47            | (0.60) | 55.4     | 1.60 (1.14-2.23)      | 0.21  | 36.0% |         |                |
| <b>Arrhythmia</b>       |                 |               |        |          |                       |              |               |        |          |                       |       |       |         |                |
| Non-users               | 11,404          | 93            | (0.82) | 61.2     | 1.00 (Reference)      | 25,295       | 170           | (0.67) | 128.8    | 1.00 (Reference)      |       |       |         |                |
| SERMs                   | 27,663          | 161           | (0.58) | 137.9    | 1.30 (1.00-1.70)      | 33,532       | 185           | (0.55) | 180.1    | 1.09 (0.88-1.34)      | 0.30  | 7.0%  |         |                |
| AIs                     | 8,575           | 69            | (0.80) | 39.5     | 1.15 (0.83-1.60)      | 16,058       | 136           | (0.85) | 80.6     | 1.07 (0.85-1.34)      | 0.70  | 0.0%  |         |                |
| Both                    | 2,748           | 36            | (1.31) | 18.1     | 1.95 (1.31-2.90)      | 7,896        | 48            | (0.61) | 55.4     | 1.03 (0.74-1.42)      | 0.01  | 83.0% |         |                |



| T2DM      |        |     |        |       |      |             |        |       |        |       |      |             |      |       |
|-----------|--------|-----|--------|-------|------|-------------|--------|-------|--------|-------|------|-------------|------|-------|
| Non-users | 11,404 | 563 | (4.94) | 61.2  | 1.00 | (Reference) | 25,295 | 1,018 | (4.02) | 128.8 | 1.00 | (Reference) |      |       |
| SERMs     | 27,663 | 919 | (3.32) | 137.9 | 1.14 | (1.02-1.27) | 33,532 | 1,217 | (3.63) | 180.1 | 1.27 | (1.17-1.38) | 0.12 | 59.0% |
| AIs       | 8,575  | 496 | (5.78) | 39.5  | 1.12 | (0.99-1.28) | 16,058 | 994   | (6.19) | 80.6  | 1.26 | (1.15-1.37) | 0.15 | 52.0% |
| Both      | 2,748  | 145 | (5.28) | 18.1  | 1.18 | (0.98-1.42) | 7,896  | 332   | (4.20) | 55.4  | 1.28 | (1.13-1.45) | 0.48 | 0.0%  |

AIs, aromatase inhibitors; CHD, coronary heart diseases; CI, confidence intervals; CVD, cardiovascular diseases; HF, heart failure; HR, hazard ratio; PY, person-years; SERMs, selective estrogen receptor modulators; T2DM, type 2 diabetes mellitus; VTE, venous thromboembolism. \*Adjusted for age at diagnosis, income level, region of residence, histological subtype, surgery, radiotherapy, trastuzumab, hypertension, dyslipidemia, osteoporosis, and T2DM (or CVDs). If the P-value was <0.1 or  $I^2 > 50\%$  in the heterogeneity test, then we hypothesized a significant difference by the stratified factor.

Table S9. The subgroup analysis by radiotherapy

|                         | No radiotherapy |               |        |          |                       |              | Radiotherapy  |        |          |                       |      |       | P-value | I <sup>2</sup> |
|-------------------------|-----------------|---------------|--------|----------|-----------------------|--------------|---------------|--------|----------|-----------------------|------|-------|---------|----------------|
|                         | No. of total    | No. of events | (%)    | 1,000 PY | Adjusted HR (95% CI)* | No. of total | No. of events | (%)    | 1,000 PY | Adjusted HR (95% CI)* |      |       |         |                |
| <b>Composite of CVD</b> |                 |               |        |          |                       |              |               |        |          |                       |      |       |         |                |
| Non-users               | 15,348          | 712           | (4.64) | 81.5     | 1.00 (Reference)      | 21,351       | 627           | (2.94) | 108.5    | 1.00 (Reference)      |      |       |         |                |
| SERMs                   | 18,670          | 626           | (3.35) | 101.9    | 1.18 (1.06-1.31)      | 42,525       | 900           | (2.12) | 216.1    | 1.11 (1.00-1.23)      | 0.41 | 0.0%  |         |                |
| AIs                     | 7,292           | 436           | (5.98) | 36.9     | 1.11 (0.98-1.25)      | 17,341       | 723           | (4.17) | 83.3     | 1.17 (1.05-1.30)      | 0.52 | 0.0%  |         |                |
| Both                    | 3,579           | 161           | (4.50) | 24.9     | 1.25 (1.05-1.49)      | 7,065        | 216           | (3.06) | 48.6     | 1.24 (1.06-1.46)      | 0.97 | 0.0%  |         |                |
| <b>Stroke</b>           |                 |               |        |          |                       |              |               |        |          |                       |      |       |         |                |
| Non-users               | 15,348          | 202           | (1.32) | 81.5     | 1.00 (Reference)      | 21,351       | 133           | (0.62) | 108.5    | 1.00 (Reference)      |      |       |         |                |
| SERMs                   | 18,670          | 182           | (0.97) | 101.9    | 1.25 (1.02-1.52)      | 42,525       | 174           | (0.41) | 216.1    | 1.18 (0.93-1.49)      | 0.71 | 0.0%  |         |                |
| AIs                     | 7,292           | 146           | (2.00) | 36.9     | 1.09 (0.88-1.35)      | 17,341       | 191           | (1.10) | 83.3     | 1.25 (1.00-1.57)      | 0.39 | 0.0%  |         |                |
| Both                    | 3,579           | 37            | (1.03) | 24.9     | 0.97 (0.68-1.38)      | 7,065        | 51            | (0.72) | 48.6     | 1.31 (0.94-1.83)      | 0.21 | 35.0% |         |                |
| <b>CHD</b>              |                 |               |        |          |                       |              |               |        |          |                       |      |       |         |                |
| Non-users               | 15,348          | 217           | (1.41) | 81.5     | 1.00 (Reference)      | 21,351       | 197           | (0.92) | 108.5    | 1.00 (Reference)      |      |       |         |                |
| SERMs                   | 18,670          | 180           | (0.96) | 101.9    | 1.10 (0.90-1.34)      | 42,525       | 285           | (0.67) | 216.1    | 1.01 (0.84-1.23)      | 0.57 | 0.0%  |         |                |
| AIs                     | 7,292           | 143           | (1.96) | 36.9     | 1.28 (1.03-1.59)      | 17,341       | 246           | (1.42) | 83.3     | 1.16 (0.96-1.41)      | 0.49 | 0.0%  |         |                |
| Both                    | 3,579           | 46            | (1.29) | 24.9     | 1.21 (0.87-1.67)      | 7,065        | 64            | (0.91) | 48.6     | 1.09 (0.82-1.45)      | 0.64 | 0.0%  |         |                |
| <b>VTE</b>              |                 |               |        |          |                       |              |               |        |          |                       |      |       |         |                |
| Non-users               | 15,348          | 51            | (0.33) | 81.5     | 1.00 (Reference)      | 21,351       | 45            | (0.21) | 108.5    | 1.00 (Reference)      |      |       |         |                |
| SERMs                   | 18,670          | 54            | (0.29) | 101.9    | 1.32 (0.90-1.94)      | 42,525       | 100           | (0.24) | 216.1    | 1.69 (1.17-2.44)      | 0.37 | 0.0%  |         |                |
| AIs                     | 7,292           | 29            | (0.40) | 36.9     | 1.27 (0.80-2.01)      | 17,341       | 45            | (0.26) | 83.3     | 1.14 (0.75-1.73)      | 0.74 | 0.0%  |         |                |
| Both                    | 3,579           | 13            | (0.36) | 24.9     | 1.54 (0.82-2.86)      | 7,065        | 22            | (0.31) | 48.6     | 1.94 (1.15-3.27)      | 0.58 | 0.0%  |         |                |
| <b>HF</b>               |                 |               |        |          |                       |              |               |        |          |                       |      |       |         |                |
| Non-users               | 15,348          | 114           | (0.74) | 81.5     | 1.00 (Reference)      | 21,351       | 117           | (0.55) | 108.5    | 1.00 (Reference)      |      |       |         |                |
| SERMs                   | 18,670          | 86            | (0.46) | 101.9    | 1.07 (0.81-1.42)      | 42,525       | 120           | (0.28) | 216.1    | 0.91 (0.70-1.18)      | 0.40 | 0.0%  |         |                |
| AIs                     | 7,292           | 51            | (0.70) | 36.9     | 0.89 (0.65-1.23)      | 17,341       | 105           | (0.61) | 83.3     | 1.19 (0.91-1.56)      | 0.18 | 45.0% |         |                |
| Both                    | 3,579           | 26            | (0.73) | 24.9     | 1.42 (0.92-2.20)      | 7,065        | 34            | (0.48) | 48.6     | 1.40 (0.95-2.08)      | 0.96 | 0.0%  |         |                |
| <b>Arrhythmia</b>       |                 |               |        |          |                       |              |               |        |          |                       |      |       |         |                |
| Non-users               | 15,348          | 128           | (0.83) | 81.5     | 1.00 (Reference)      | 21,351       | 135           | (0.63) | 108.5    | 1.00 (Reference)      |      |       |         |                |
| SERMs                   | 18,670          | 125           | (0.67) | 101.9    | 1.20 (0.94-1.53)      | 42,525       | 221           | (0.52) | 216.1    | 1.11 (0.89-1.38)      | 0.64 | 0.0%  |         |                |
| AIs                     | 7,292           | 69            | (0.95) | 36.9     | 1.07 (0.80-1.43)      | 17,341       | 136           | (0.78) | 83.3     | 1.12 (0.87-1.42)      | 0.82 | 0.0%  |         |                |
| Both                    | 3,579           | 39            | (1.09) | 24.9     | 1.55 (1.08-2.24)      | 7,065        | 45            | (0.64) | 48.6     | 1.12 (0.79-1.58)      | 0.20 | 38.0% |         |                |

| T2DM      |        |     |        |       |      |             |        |       |        |       |      |             |      |       |
|-----------|--------|-----|--------|-------|------|-------------|--------|-------|--------|-------|------|-------------|------|-------|
| Non-users | 15,348 | 781 | (5.09) | 81.5  | 1.00 | (Reference) | 21,351 | 800   | (3.75) | 108.5 | 1.00 | (Reference) |      |       |
| SERMs     | 18,670 | 766 | (4.10) | 101.9 | 1.18 | (1.07-1.31) | 42,525 | 1,370 | (3.22) | 216.1 | 1.28 | (1.16-1.40) | 0.28 | 15.0% |
| AIs       | 7,292  | 511 | (7.01) | 36.9  | 1.23 | (1.09-1.37) | 17,341 | 979   | (5.65) | 83.3  | 1.21 | (1.10-1.33) | 0.88 | 0.0%  |
| Both      | 3,579  | 176 | (4.92) | 24.9  | 1.14 | (0.97-1.35) | 7,065  | 301   | (4.26) | 48.6  | 1.32 | (1.15-1.51) | 0.20 | 39.0% |

AIs, aromatase inhibitors; CHD, coronary heart diseases; CI, confidence intervals; CVD, cardiovascular diseases; HF, heart failure; HR, hazard ratio; PY, person-years; SERMs, selective estrogen receptor modulators; T2DM, type 2 diabetes mellitus; VTE, venous thromboembolism. \*Adjusted for age at diagnosis, income level, region of residence, histological subtype, surgery, chemotherapy, trastuzumab, hypertension, dyslipidemia, osteoporosis, and T2DM (or CVDs). If the P-value was <0.1 or  $I^2 > 50\%$  in the heterogeneity test, then we hypothesized a significant difference by the stratified factor.

Table S10. The subgroup analysis by trastuzumab

|                         | No trastuzumab |               |        |          |                       |              | Trastuzumab   |     |          |                       |      |             | P-value | I <sup>2</sup> |
|-------------------------|----------------|---------------|--------|----------|-----------------------|--------------|---------------|-----|----------|-----------------------|------|-------------|---------|----------------|
|                         | No. of total   | No. of events | (%)    | 1,000 PY | Adjusted HR (95% CI)* | No. of total | No. of events | (%) | 1,000 PY | Adjusted HR (95% CI)* |      |             |         |                |
| <b>Composite of CVD</b> |                |               |        |          |                       |              |               |     |          |                       |      |             |         |                |
| Non-users               | 30,794         | 1,146         | (3.72) | 165.8    | 1.00                  | (Reference)  | 5,905         | 193 | (3.27)   | 24.2                  | 1.00 | (Reference) |         |                |
| SERMs                   | 56,672         | 1,410         | (2.49) | 298.8    | 1.13                  | (1.04-1.22)  | 4,523         | 116 | (2.56)   | 19.2                  | 0.98 | (0.77-1.25) | 0.30    | 7.0%           |
| AIs                     | 22,283         | 1,055         | (4.73) | 110.5    | 1.12                  | (1.03-1.22)  | 2,350         | 104 | (4.43)   | 9.7                   | 1.31 | (1.03-1.66) | 0.21    | 35.0%          |
| Both                    | 9,867          | 358           | (3.63) | 69.1     | 1.23                  | (1.09-1.39)  | 777           | 19  | (2.45)   | 4.3                   | 1.33 | (0.82-2.15) | 0.75    | 0.0%           |
| <b>Stroke</b>           |                |               |        |          |                       |              |               |     |          |                       |      |             |         |                |
| Non-users               | 30,794         | 306           | (0.99) | 165.8    | 1.00                  | (Reference)  | 5,905         | 29  | (0.49)   | 24.2                  | 1.00 | (Reference) |         |                |
| SERMs                   | 56,672         | 335           | (0.59) | 298.8    | 1.16                  | (0.99-1.35)  | 4,523         | 21  | (0.46)   | 19.2                  | 1.67 | (0.93-3.02) | 0.24    | 28.0%          |
| AIs                     | 22,283         | 313           | (1.40) | 110.5    | 1.11                  | (0.95-1.30)  | 2,350         | 24  | (1.02)   | 9.7                   | 1.77 | (1.03-3.06) | 0.11    | 62.0%          |
| Both                    | 9,867          | 84            | (0.85) | 69.1     | 1.10                  | (0.86-1.41)  | 777           | 4   | (0.51)   | 4.3                   | 1.38 | (0.48-3.97) | 0.69    | 0.0%           |
| <b>CHD</b>              |                |               |        |          |                       |              |               |     |          |                       |      |             |         |                |
| Non-users               | 30,794         | 375           | (1.22) | 165.8    | 1.00                  | (Reference)  | 5,905         | 39  | (0.66)   | 24.2                  | 1.00 | (Reference) |         |                |
| SERMs                   | 56,672         | 438           | (0.77) | 298.8    | 1.01                  | (0.88-1.16)  | 4,523         | 27  | (0.60)   | 19.2                  | 1.28 | (0.76-2.17) | 0.39    | 0.0%           |
| AIs                     | 22,283         | 368           | (1.65) | 110.5    | 1.21                  | (1.04-1.40)  | 2,350         | 21  | (0.89)   | 9.7                   | 1.32 | (0.79-2.20) | 0.75    | 0.0%           |
| Both                    | 9,867          | 104           | (1.05) | 69.1     | 1.11                  | (0.89-1.38)  | 777           | 6   | (0.77)   | 4.3                   | 1.91 | (0.80-4.61) | 0.24    | 29.0%          |
| <b>VTE</b>              |                |               |        |          |                       |              |               |     |          |                       |      |             |         |                |
| Non-users               | 30,794         | 77            | (0.25) | 165.8    | 1.00                  | (Reference)  | 5,905         | 19  | (0.32)   | 24.2                  | 1.00 | (Reference) |         |                |
| SERMs                   | 56,672         | 149           | (0.26) | 298.8    | 1.62                  | (1.22-2.14)  | 4,523         | 5   | (0.11)   | 19.2                  | 0.51 | (0.19-1.36) | 0.03    | 80.0%          |
| AIs                     | 22,283         | 65            | (0.29) | 110.5    | 1.20                  | (0.86-1.67)  | 2,350         | 9   | (0.38)   | 9.7                   | 1.16 | (0.53-2.55) | 0.94    | 0.0%           |
| Both                    | 9,867          | 33            | (0.33) | 69.1     | 1.80                  | (1.18-2.73)  | 777           | 2   | (0.26)   | 4.3                   | 1.49 | (0.34-6.59) | 0.81    | 0.0%           |
| <b>HF</b>               |                |               |        |          |                       |              |               |     |          |                       |      |             |         |                |
| Non-users               | 30,794         | 154           | (0.50) | 165.8    | 1.00                  | (Reference)  | 5,905         | 77  | (1.30)   | 24.2                  | 1.00 | (Reference) |         |                |
| SERMs                   | 56,672         | 158           | (0.28) | 298.8    | 0.99                  | (0.79-1.23)  | 4,523         | 48  | (1.06)   | 19.2                  | 0.82 | (0.56-1.20) | 0.41    | 0.0%           |
| AIs                     | 22,283         | 125           | (0.56) | 110.5    | 1.03                  | (0.81-1.30)  | 2,350         | 31  | (1.32)   | 9.7                   | 1.16 | (0.76-1.75) | 0.62    | 0.0%           |
| Both                    | 9,867          | 54            | (0.55) | 69.1     | 1.35                  | (0.99-1.86)  | 777           | 6   | (0.77)   | 4.3                   | 1.79 | (0.77-4.20) | 0.54    | 0.0%           |
| <b>Arrhythmia</b>       |                |               |        |          |                       |              |               |     |          |                       |      |             |         |                |
| Non-users               | 30,794         | 234           | (0.76) | 165.8    | 1.00                  | (Reference)  | 5,905         | 29  | (0.49)   | 24.2                  | 1.00 | (Reference) |         |                |
| SERMs                   | 56,672         | 331           | (0.58) | 298.8    | 1.16                  | (0.98-1.38)  | 4,523         | 15  | (0.33)   | 19.2                  | 0.77 | (0.40-1.48) | 0.23    | 30.0%          |
| AIs                     | 22,283         | 186           | (0.83) | 110.5    | 1.07                  | (0.88-1.30)  | 2,350         | 19  | (0.81)   | 9.7                   | 1.38 | (0.76-2.51) | 0.42    | 0.0%           |
| Both                    | 9,867          | 83            | (0.84) | 69.1     | 1.33                  | (1.03-1.72)  | 777           | 1   | (0.13)   | 4.3                   | 0.31 | (0.04-2.31) | 0.16    | 50.0%          |

| T2DM      |        |       |        |       |      |             |       |     |        |      |      |             |      |       |
|-----------|--------|-------|--------|-------|------|-------------|-------|-----|--------|------|------|-------------|------|-------|
| Non-users | 30,794 | 1,390 | (4.51) | 165.8 | 1.00 | (Reference) | 5,905 | 191 | (3.23) | 24.2 | 1.00 | (Reference) |      |       |
| SERMs     | 56,672 | 2,038 | (3.60) | 298.8 | 1.23 | (1.15-1.32) | 4,523 | 98  | (2.17) | 19.2 | 1.04 | (0.80-1.34) | 0.20 | 39.0% |
| AIs       | 22,283 | 1,392 | (6.25) | 110.5 | 1.23 | (1.14-1.33) | 2,350 | 98  | (4.17) | 9.7  | 1.12 | (0.88-1.43) | 0.47 | 0.0%  |
| Both      | 9,867  | 457   | (4.63) | 69.1  | 1.25 | (1.13-1.40) | 777   | 20  | (2.57) | 4.3  | 1.12 | (0.70-1.78) | 0.64 | 0.0%  |

AIs, aromatase inhibitors; CHD, coronary heart diseases; CI, confidence intervals; CVD, cardiovascular diseases; HF, heart failure; HR, hazard ratio; PY, person-years; SERMs, selective estrogen receptor modulators; T2DM, type 2 diabetes mellitus; VTE, venous thromboembolism. <sup>1</sup>Adjusted for age at diagnosis, income level, region of residence, histological subtype, surgery, chemotherapy, radiotherapy, hypertension, dyslipidemia, osteoporosis, and T2DM (or CVDs). If the P-value was <0.1 or I<sup>2</sup>>50% in the heterogeneity test, then we hypothesized a significant difference by the stratified factor.

Table S11. The subgroup analysis by regimen types

|                         | No. of total | No. of events | (%)     | 1,000 PY | Age-adjusted HR (95% CI) | Adjusted HR (95% CI)* |
|-------------------------|--------------|---------------|---------|----------|--------------------------|-----------------------|
| <b>Composite of CVD</b> |              |               |         |          |                          |                       |
| Non-users               | 36,699       | 1,399         | (3.81)  | 190.0    | 1.00 (Reference)         | 1.00 (Reference)      |
| Tamoxifen               | 58,809       | 1,341         | (2.28)  | 299.0    | 0.96 (0.89-1.04)         | 1.04 (0.96-1.13)      |
| Toremifene              | 1,502        | 138           | (9.19)  | 11.7     | 1.22 (1.02-1.46)         | 1.20 (1.00-1.43)      |
| Anastrozole             | 9,173        | 475           | (5.18)  | 47.2     | 0.99 (0.89-1.10)         | 1.04 (0.93-1.15)      |
| Letrozole               | 14,495       | 642           | (4.43)  | 68.1     | 0.98 (0.89-1.08)         | 1.04 (0.94-1.15)      |
| <b>Stroke</b>           |              |               |         |          |                          |                       |
| Non-users               | 36,699       | 335           | (0.91)  | 190.0    | 1.00 (Reference)         | 1.00 (Reference)      |
| Tamoxifen               | 58,809       | 307           | (0.52)  | 299.0    | 1.07 (0.91-1.25)         | 1.14 (0.97-1.34)      |
| Toremifene              | 1,502        | 42            | (2.80)  | 11.7     | 1.28 (0.93-1.77)         | 1.19 (0.86-1.65)      |
| Anastrozole             | 9,173        | 142           | (1.55)  | 47.2     | 1.04 (0.85-1.26)         | 1.11 (0.91-1.35)      |
| Letrozole               | 14,495       | 186           | (1.28)  | 68.1     | 1.02 (0.85-1.22)         | 1.10 (0.91-1.32)      |
| <b>CHD</b>              |              |               |         |          |                          |                       |
| Non-users               | 36,699       | 414           | (1.13)  | 190.0    | 1.00 (Reference)         | 1.00 (Reference)      |
| Tamoxifen               | 58,809       | 400           | (0.68)  | 299.0    | 0.92 (0.79-1.05)         | 0.93 (0.80-1.08)      |
| Toremifene              | 1,502        | 46            | (3.06)  | 11.7     | 1.32 (0.97-1.79)         | 1.24 (0.91-1.69)      |
| Anastrozole             | 9,173        | 156           | (1.70)  | 47.2     | 1.06 (0.88-1.27)         | 1.09 (0.90-1.32)      |
| Letrozole               | 14,495       | 225           | (1.55)  | 68.1     | 1.13 (0.96-1.33)         | 1.18 (1.00-1.40)      |
| <b>VTE</b>              |              |               |         |          |                          |                       |
| Non-users               | 36,699       | 96            | (0.26)  | 190.0    | 1.00 (Reference)         | 1.00 (Reference)      |
| Tamoxifen               | 58,809       | 140           | (0.24)  | 299.0    | 1.24 (0.95-1.62)         | 1.36 (1.03-1.79)      |
| Toremifene              | 1,502        | 11            | (0.73)  | 11.7     | 1.51 (0.81-2.83)         | 1.51 (0.80-2.83)      |
| Anastrozole             | 9,173        | 31            | (0.34)  | 47.2     | 1.00 (0.66-1.50)         | 1.05 (0.69-1.59)      |
| Letrozole               | 14,495       | 37            | (0.26)  | 68.1     | 0.86 (0.59-1.26)         | 0.90 (0.61-1.33)      |
| <b>HF</b>               |              |               |         |          |                          |                       |
| Non-users               | 36,699       | 231           | (0.63)  | 190.0    | 1.00 (Reference)         | 1.00 (Reference)      |
| Tamoxifen               | 58,809       | 191           | (0.32)  | 299.0    | 0.71 (0.59-0.87)         | 0.94 (0.77-1.16)      |
| Toremifene              | 1,502        | 12            | (0.80)  | 11.7     | 0.71 (0.39-1.26)         | 0.83 (0.46-1.49)      |
| Anastrozole             | 9,173        | 67            | (0.73)  | 47.2     | 0.90 (0.68-1.18)         | 1.02 (0.77-1.35)      |
| Letrozole               | 14,495       | 74            | (0.51)  | 68.1     | 0.71 (0.55-0.93)         | 0.78 (0.60-1.03)      |
| <b>Arrhythmia</b>       |              |               |         |          |                          |                       |
| Non-users               | 36,699       | 263           | (0.72)  | 190.0    | 1.00 (Reference)         | 1.00 (Reference)      |
| Tamoxifen               | 58,809       | 304           | (0.52)  | 299.0    | 0.99 (0.83-1.17)         | 0.99 (0.83-1.17)      |
| Toremifene              | 1,502        | 27            | (1.80)  | 11.7     | 1.28 (0.86-1.90)         | 1.28 (0.86-1.90)      |
| Anastrozole             | 9,173        | 80            | (0.87)  | 47.2     | 0.93 (0.72-1.20)         | 0.93 (0.72-1.20)      |
| Letrozole               | 14,495       | 121           | (0.83)  | 68.1     | 1.04 (0.84-1.30)         | 1.04 (0.84-1.30)      |
| <b>T2DM</b>             |              |               |         |          |                          |                       |
| Non-users               | 36,699       | 1,581         | (4.31)  | 190.0    | 1.00 (Reference)         | 1.00 (Reference)      |
| Tamoxifen               | 58,809       | 1,910         | (3.25)  | 299.0    | 1.08 (1.01-1.16)         | 1.14 (1.07-1.23)      |
| Toremifene              | 1,502        | 157           | (10.45) | 11.7     | 1.22 (1.04-1.44)         | 1.15 (0.97-1.35)      |
| Anastrozole             | 9,173        | 591           | (6.44)  | 47.2     | 1.10 (1.00-1.21)         | 1.10 (1.00-1.21)      |
| Letrozole               | 14,495       | 834           | (5.75)  | 68.1     | 1.14 (1.05-1.24)         | 1.14 (1.05-1.25)      |

AIs, aromatase inhibitors; CHD, coronary heart diseases; CI, confidence intervals; CVD, cardiovascular diseases; HF, heart failure; HR, hazard ratio; PY, person-years; SERMs, selective estrogen receptor modulators; T2DM, type 2 diabetes mellitus; VTE, venous thromboembolism. \*Adjusted for age at diagnosis, income level, region of residence, histological subtype, surgery, chemotherapy, radiotherapy, trastuzumab, hypertension, dyslipidemia, osteoporosis, and T2DM (or CVDs).

Table S12. The subgroup analysis by menopausal status in the health screening subjects

|                         | Pre-menopausal |               |        |          |                       |             | Post-menopausal |               |        |          |                       |             | P-value | I <sup>2</sup> |
|-------------------------|----------------|---------------|--------|----------|-----------------------|-------------|-----------------|---------------|--------|----------|-----------------------|-------------|---------|----------------|
|                         | No. of total   | No. of events | (%)    | 1,000 PY | Adjusted HR (95% CI)* |             | No. of total    | No. of events | (%)    | 1,000 PY | Adjusted HR (95% CI)* |             |         |                |
| <b>Composite of CVD</b> |                |               |        |          |                       |             |                 |               |        |          |                       |             |         |                |
| Non-users               | 9,324          | 218           | (2.34) | 45.5     | 1.00                  | (Reference) | 8,706           | 322           | (3.70) | 35.6     | 1.00                  | (Reference) |         |                |
| SERMs                   | 27,801         | 478           | (1.72) | 127.8    | 1.11                  | (0.94-1.31) | 5,606           | 194           | (3.46) | 24.1     | 1.05                  | (0.88-1.26) | 0.66    | 0.0%           |
| AIs                     | 3,107          | 126           | (4.06) | 17.5     | 1.31                  | (1.05-1.63) | 12,234          | 435           | (3.56) | 48.8     | 1.02                  | (0.88-1.18) | 0.06    | 72.0%          |
| Both                    | 3,240          | 78            | (2.41) | 22.7     | 1.26                  | (0.97-1.64) | 2,045           | 68            | (3.33) | 11.0     | 1.00                  | (0.76-1.30) | 0.22    | 33.0%          |
| <b>Stroke</b>           |                |               |        |          |                       |             |                 |               |        |          |                       |             |         |                |
| Non-users               | 9,324          | 41            | (0.44) | 45.5     | 1.00                  | (Reference) | 8,706           | 88            | (1.01) | 35.6     | 1.00                  | (Reference) |         |                |
| SERMs                   | 27,801         | 94            | (0.34) | 127.8    | 1.28                  | (0.88-1.87) | 5,606           | 45            | (0.80) | 24.1     | 0.82                  | (0.58-1.18) | 0.09    | 64.0%          |
| AIs                     | 3,107          | 30            | (0.97) | 17.5     | 1.35                  | (0.84-2.16) | 12,234          | 122           | (1.00) | 48.8     | 1.07                  | (0.81-1.42) | 0.42    | 0.0%           |
| Both                    | 3,240          | 14            | (0.43) | 22.7     | 1.15                  | (0.62-2.15) | 2,045           | 19            | (0.93) | 11.0     | 0.97                  | (0.59-1.61) | 0.67    | 0.0%           |
| <b>CHD</b>              |                |               |        |          |                       |             |                 |               |        |          |                       |             |         |                |
| Non-users               | 9,324          | 68            | (0.73) | 45.5     | 1.00                  | (Reference) | 8,706           | 108           | (1.24) | 35.6     | 1.00                  | (Reference) |         |                |
| SERMs                   | 27,801         | 141           | (0.51) | 127.8    | 1.03                  | (0.77-1.39) | 5,606           | 74            | (1.32) | 24.1     | 1.02                  | (0.75-1.37) | 0.93    | 0.0%           |
| AIs                     | 3,107          | 44            | (1.42) | 17.5     | 1.49                  | (1.03-2.16) | 12,234          | 135           | (1.10) | 48.8     | 0.91                  | (0.70-1.18) | 0.03    | 78.0%          |
| Both                    | 3,240          | 26            | (0.80) | 22.7     | 1.33                  | (0.83-2.11) | 2,045           | 22            | (1.08) | 11.0     | 0.91                  | (0.57-1.46) | 0.27    | 19.0%          |
| <b>VTE</b>              |                |               |        |          |                       |             |                 |               |        |          |                       |             |         |                |
| Non-users               | 9,324          | 12            | (0.13) | 45.5     | 1.00                  | (Reference) | 8,706           | 24            | (0.28) | 35.6     | 1.00                  | (Reference) |         |                |
| SERMs                   | 27,801         | 58            | (0.21) | 127.8    | 2.59                  | (1.36-4.90) | 5,606           | 12            | (0.21) | 24.1     | 1.04                  | (0.53-2.06) | 0.06    | 72.0%          |
| AIs                     | 3,107          | 6             | (0.19) | 17.5     | 1.22                  | (0.47-3.18) | 12,234          | 30            | (0.25) | 48.8     | 0.93                  | (0.54-1.61) | 0.63    | 0.0%           |
| Both                    | 3,240          | 8             | (0.25) | 22.7     | 2.58                  | (1.03-6.48) | 2,045           | 6             | (0.29) | 11.0     | 1.24                  | (0.50-3.09) | 0.27    | 19.0%          |
| <b>HF</b>               |                |               |        |          |                       |             |                 |               |        |          |                       |             |         |                |
| Non-users               | 9,324          | 43            | (0.46) | 45.5     | 1.00                  | (Reference) | 8,706           | 47            | (0.54) | 35.6     | 1.00                  | (Reference) |         |                |
| SERMs                   | 27,801         | 56            | (0.20) | 127.8    | 0.75                  | (0.51-1.12) | 5,606           | 24            | (0.43) | 24.1     | 1.40                  | (0.86-2.29) | 0.05    | 73.0%          |
| AIs                     | 3,107          | 21            | (0.68) | 17.5     | 1.51                  | (0.90-2.53) | 12,234          | 64            | (0.52) | 48.8     | 1.11                  | (0.76-1.64) | 0.35    | 0.0%           |
| Both                    | 3,240          | 13            | (0.40) | 22.7     | 1.43                  | (0.75-2.74) | 2,045           | 7             | (0.34) | 11.0     | 0.97                  | (0.43-2.19) | 0.47    | 0.0%           |
| <b>Arrhythmia</b>       |                |               |        |          |                       |             |                 |               |        |          |                       |             |         |                |
| Non-users               | 9,324          | 54            | (0.58) | 45.5     | 1.00                  | (Reference) | 8,706           | 55            | (0.63) | 35.6     | 1.00                  | (Reference) |         |                |
| SERMs                   | 27,801         | 129           | (0.46) | 127.8    | 1.02                  | (0.74-1.41) | 5,606           | 39            | (0.70) | 24.1     | 1.26                  | (0.84-1.90) | 0.43    | 0.0%           |
| AIs                     | 3,107          | 25            | (0.80) | 17.5     | 1.01                  | (0.62-1.63) | 12,234          | 85            | (0.69) | 48.8     | 1.14                  | (0.81-1.62) | 0.67    | 0.0%           |
| Both                    | 3,240          | 17            | (0.52) | 22.7     | 0.96                  | (0.55-1.68) | 2,045           | 14            | (0.68) | 11.0     | 1.08                  | (0.60-1.96) | 0.78    | 0.0%           |

| T2DM      |        |     |        |       |      |             |        |     |        |      |      |             |      |       |
|-----------|--------|-----|--------|-------|------|-------------|--------|-----|--------|------|------|-------------|------|-------|
| Non-users | 9,324  | 284 | (3.05) | 45.5  | 1.00 | (Reference) | 8,706  | 375 | (4.31) | 35.6 | 1.00 | (Reference) |      |       |
| SERMs     | 27,801 | 720 | (2.59) | 127.8 | 1.24 | (1.08-1.43) | 5,606  | 267 | (4.76) | 24.1 | 1.27 | (1.08-1.48) | 0.87 | 0.0%  |
| AIs       | 3,107  | 162 | (5.21) | 17.5  | 1.12 | (0.92-1.36) | 12,234 | 590 | (4.82) | 48.8 | 1.24 | (1.09-1.42) | 0.38 | 0.0%  |
| Both      | 3,240  | 99  | (3.06) | 22.7  | 1.14 | (0.90-1.43) | 2,045  | 107 | (5.23) | 11.0 | 1.39 | (1.11-1.73) | 0.22 | 33.0% |

AIs, aromatase inhibitors; CHD, coronary heart diseases; CI, confidence intervals; CVD, cardiovascular diseases; HF, heart failure; HR, hazard ratio; PY, person-years; SERMs, selective estrogen receptor modulators; T2DM, type 2 diabetes mellitus; VTE, venous thromboembolism. \*Adjusted for age at diagnosis, income level, region of residence, histological subtype, surgery, chemotherapy, radiotherapy, trastuzumab, hypertension, dyslipidemia, osteoporosis, T2DM (or CVDs), BMI, smoking, alcohol consumption, and physical activity. If the P-value was <0.1 or I<sup>2</sup>>50% in the heterogeneity test, then we hypothesized a significant difference by the stratified factor.



Table S13. The sensitivity analysis after excluding short-term users;  $\geq 6$  or  $\geq 12$  month use)

|                  | $\geq 6$ months use (N=130,696) |               |        |                       |             | $\geq 12$ months use (N=125,555) |               |        |                       |             |
|------------------|---------------------------------|---------------|--------|-----------------------|-------------|----------------------------------|---------------|--------|-----------------------|-------------|
|                  | No. of total                    | No. of events | (%)    | Adjusted HR (95% CI)* |             | No. of total                     | No. of events | (%)    | Adjusted HR (95% CI)* |             |
| Composite of CVD |                                 |               |        |                       |             |                                  |               |        |                       |             |
| Non-users        | 36,699                          | 1,339         | (3.65) | 1.00                  | (Reference) | 36,699                           | 1,339         | (3.65) | 1.00                  | (Reference) |
| SERMs            | 59,417                          | 1,475         | (2.48) | 1.12                  | (1.04-1.21) | 55,949                           | 1,405         | (2.51) | 1.10                  | (1.02-1.18) |
| AIs              | 24,044                          | 1,140         | (4.74) | 1.13                  | (1.04-1.22) | 22,692                           | 1,109         | (4.89) | 1.11                  | (1.02-1.20) |
| Both             | 10,536                          | 373           | (3.54) | 1.23                  | (1.09-1.38) | 10,215                           | 365           | (3.57) | 1.21                  | (1.08-1.36) |
| Stroke           |                                 |               |        |                       |             |                                  |               |        |                       |             |
| Non-users        | 36,699                          | 335           | (0.91) | 1.00                  | (Reference) | 36,699                           | 335           | (0.91) | 1.00                  | (Reference) |
| SERMs            | 59,417                          | 336           | (0.57) | 1.18                  | (1.01-1.37) | 55,949                           | 312           | (0.56) | 1.13                  | (0.97-1.32) |
| AIs              | 24,044                          | 330           | (1.37) | 1.14                  | (0.98-1.33) | 22,692                           | 326           | (1.44) | 1.15                  | (0.99-1.34) |
| Both             | 10,536                          | 87            | (0.83) | 1.12                  | (0.88-1.42) | 10,215                           | 85            | (0.83) | 1.10                  | (0.87-1.41) |
| CHD              |                                 |               |        |                       |             |                                  |               |        |                       |             |
| Non-users        | 36,699                          | 414           | (1.13) | 1.00                  | (Reference) | 36,699                           | 414           | (1.13) | 1.00                  | (Reference) |
| SERMs            | 59,417                          | 447           | (0.75) | 1.01                  | (0.88-1.16) | 55,949                           | 431           | (0.77) | 1.01                  | (0.88-1.16) |
| AIs              | 24,044                          | 384           | (1.60) | 1.21                  | (1.05-1.40) | 22,692                           | 376           | (1.66) | 1.20                  | (1.04-1.38) |
| Both             | 10,536                          | 108           | (1.03) | 1.13                  | (0.91-1.40) | 10,215                           | 106           | (1.04) | 1.12                  | (0.90-1.39) |
| VTE              |                                 |               |        |                       |             |                                  |               |        |                       |             |
| Non-users        | 36,699                          | 96            | (0.26) | 1.00                  | (Reference) | 36,699                           | 96            | (0.26) | 1.00                  | (Reference) |
| SERMs            | 59,417                          | 152           | (0.26) | 1.49                  | (1.15-1.94) | 55,949                           | 143           | (0.26) | 1.43                  | (1.10-1.87) |
| AIs              | 24,044                          | 72            | (0.30) | 1.15                  | (0.85-1.57) | 22,692                           | 66            | (0.29) | 1.08                  | (0.79-1.47) |
| Both             | 10,536                          | 35            | (0.33) | 1.72                  | (1.16-2.55) | 10,215                           | 34            | (0.33) | 1.66                  | (1.11-2.48) |
| HF               |                                 |               |        |                       |             |                                  |               |        |                       |             |
| Non-users        | 36,699                          | 231           | (0.63) | 1.00                  | (Reference) | 36,699                           | 231           | (0.63) | 1.00                  | (Reference) |
| SERMs            | 59,417                          | 202           | (0.34) | 0.99                  | (0.81-1.20) | 55,949                           | 189           | (0.34) | 0.95                  | (0.78-1.15) |
| AIs              | 24,044                          | 154           | (0.64) | 1.04                  | (0.85-1.28) | 22,692                           | 146           | (0.64) | 1.01                  | (0.82-1.24) |
| Both             | 10,536                          | 60            | (0.57) | 1.41                  | (1.05-1.89) | 10,215                           | 59            | (0.58) | 1.39                  | (1.04-1.87) |
| Arrhythmia       |                                 |               |        |                       |             |                                  |               |        |                       |             |
| Non-users        | 36,699                          | 263           | (0.72) | 1.00                  | (Reference) | 36,699                           | 263           | (0.72) | 1.00                  | (Reference) |
| SERMs            | 59,417                          | 339           | (0.57) | 1.14                  | (0.97-1.34) | 55,949                           | 331           | (0.59) | 1.14                  | (0.97-1.34) |
| AIs              | 24,044                          | 202           | (0.84) | 1.08                  | (0.89-1.30) | 22,692                           | 197           | (0.87) | 1.06                  | (0.88-1.28) |
| Both             | 10,536                          | 83            | (0.79) | 1.26                  | (0.98-1.62) | 10,215                           | 81            | (0.79) | 1.24                  | (0.96-1.60) |

| T2DM      |        |       |        |      |             |        |       |        |      |             |
|-----------|--------|-------|--------|------|-------------|--------|-------|--------|------|-------------|
| Non-users | 36,699 | 1,581 | (4.31) | 1.00 | (Reference) | 36,699 | 1,581 | (4.31) | 1.00 | (Reference) |
| SERMs     | 59,417 | 2,076 | (3.49) | 1.22 | (1.14-1.30) | 55,949 | 2,007 | (3.59) | 1.21 | (1.14-1.30) |
| AIs       | 24,044 | 1,478 | (6.15) | 1.22 | (1.14-1.31) | 22,692 | 1,445 | (6.37) | 1.21 | (1.13-1.30) |
| Both      | 10,536 | 476   | (4.52) | 1.24 | (1.12-1.38) | 10,215 | 469   | (4.59) | 1.24 | (1.12-1.38) |

AIs, aromatase inhibitors; CHD, coronary heart diseases; CI, confidence intervals; CVD, cardiovascular diseases; HF, heart failure; HR, hazard ratio; PY, person-years; SERMs, selective estrogen receptor modulators; T2DM, type 2 diabetes mellitus; VTE, venous thromboembolism. \*Adjusted for age at diagnosis, income level, region of residence, histological subtype, surgery, chemotherapy, radiotherapy, trastuzumab, hypertension, dyslipidemia, osteoporosis, and T2DM (or CVDs).

Table S14. The sensitivity analysis in patients with a followed-up duration  $\geq 5$  years

|                         | No. of total | No. of events | (%)    | 1,000 PY | Age adjusted HR (95% CI) | Adjusted HR (95% CI)*   |
|-------------------------|--------------|---------------|--------|----------|--------------------------|-------------------------|
| <b>Composite of CVD</b> |              |               |        |          |                          |                         |
| Non-users               | 16,678       | 399           | (2.39) | 135.5    | 1.00 (Reference)         | 1.00 (Reference)        |
| SERMs                   | 28,314       | 501           | (1.77) | 224.7    | 1.39 (1.23-1.58)         | 1.44 (1.26-1.63)        |
| AIs                     | 10,375       | 318           | (3.07) | 80.7     | 1.17 (1.02-1.35)         | 1.21 (1.04-1.40)        |
| Both                    | 7,566        | 210           | (2.78) | 63.2     | 1.33 (1.12-1.57)         | 1.36 (1.15-1.61)        |
| <b>Stroke</b>           |              |               |        |          |                          |                         |
| Non-users               | 16,678       | 97            | (0.58) | 135.5    | 1.00 (Reference)         | 1.00 (Reference)        |
| SERMs                   | 28,314       | 110           | (0.39) | 224.7    | 1.42 (1.09-1.85)         | 1.48 (1.13-1.94)        |
| AIs                     | 10,375       | 105           | (1.01) | 80.7     | 1.36 (1.03-1.78)         | 1.42 (1.07-1.87)        |
| Both                    | 7,566        | 44            | (0.58) | 63.2     | 1.18 (0.83-1.69)         | 1.23 (0.86-1.76)        |
| <b>CHD</b>              |              |               |        |          |                          |                         |
| Non-users               | 16,678       | 122           | (0.73) | 135.5    | 1.00 (Reference)         | 1.00 (Reference)        |
| SERMs                   | 28,314       | 173           | (0.61) | 224.7    | 1.45 (1.15-1.82)         | 1.45 (1.15-1.83)        |
| AIs                     | 10,375       | 106           | (1.02) | 80.7     | 1.34 (1.04-1.73)         | 1.42 (1.10-1.84)        |
| Both                    | 7,566        | 60            | (0.79) | 63.2     | 1.24 (0.91-1.70)         | 1.30 (0.95-1.78)        |
| <b>VTE</b>              |              |               |        |          |                          |                         |
| Non-users               | 16,678       | 28            | (0.17) | 135.5    | 1.00 (Reference)         | 1.00 (Reference)        |
| SERMs                   | 28,314       | 40            | (0.14) | 224.7    | 1.41 (0.88-2.26)         | 1.50 (0.93-2.41)        |
| AIs                     | 10,375       | 21            | (0.20) | 80.7     | 1.29 (0.75-2.21)         | 1.39 (0.80-2.40)        |
| Both                    | 7,566        | 18            | (0.24) | 63.2     | 1.59 (0.88-2.88)         | 1.66 (0.91-3.02)        |
| <b>HF</b>               |              |               |        |          |                          |                         |
| Non-users               | 16,678       | 45            | (0.27) | 135.5    | 1.00 (Reference)         | 1.00 (Reference)        |
| SERMs                   | 28,314       | 56            | (0.20) | 224.7    | 1.44 (1.00-2.09)         | <b>1.55 (1.06-2.25)</b> |
| AIs                     | 10,375       | 37            | (0.36) | 80.7     | 1.35 (0.89-2.05)         | 1.41 (0.92-2.16)        |
| Both                    | 7,566        | 36            | (0.48) | 63.2     | 1.98 (1.28-3.08)         | 2.09 (1.34-3.26)        |
| <b>Arrhythmia</b>       |              |               |        |          |                          |                         |
| Non-users               | 16,678       | 107           | (0.64) | 135.5    | 1.00 (Reference)         | 1.00 (Reference)        |
| SERMs                   | 28,314       | 122           | (0.43) | 224.7    | 1.25 (0.97-1.61)         | 1.28 (0.99-1.65)        |
| AIs                     | 10,375       | 49            | (0.47) | 80.7     | 0.72 (0.52-0.99)         | 0.68 (0.49-0.95)        |
| Both                    | 7,566        | 52            | (0.69) | 63.2     | 1.21 (0.87-1.69)         | 1.17 (0.84-1.64)        |
| <b>T2DM</b>             |              |               |        |          |                          |                         |
| Non-users               | 16,678       | 548           | (3.29) | 135.5    | 1.00 (Reference)         | 1.00 (Reference)        |
| SERMs                   | 28,314       | 626           | (2.21) | 224.7    | 1.18 (1.05-1.31)         | 1.22 (1.09-1.37)        |
| AIs                     | 10,375       | 480           | (4.63) | 80.7     | 1.30 (1.16-1.47)         | 1.30 (1.15-1.47)        |
| Both                    | 7,566        | 268           | (3.54) | 63.2     | 1.20 (1.03-1.39)         | 1.20 (1.03-1.39)        |

AIs, aromatase inhibitors; CHD, coronary heart diseases; CI, confidence intervals; CVD, cardiovascular diseases; HF, heart failure; HR, hazard ratio; PY, person-years; SERMs, selective estrogen receptor modulators; T2DM, type 2 diabetes mellitus; VTE, venous thromboembolism. \*Adjusted for age at diagnosis, income level, region of residence, histological subtype, surgery, chemotherapy, radiotherapy, trastuzumab, hypertension, dyslipidemia, osteoporosis, and T2DM (or CVDs).

Table S15. The sensitivity analysis; the users having at least two prescriptions

|                         | No. of total | No. of events | (%)    | 1,000 PY | Age-adjusted HR (95% CI) | Adjusted HR (95% CI)* |
|-------------------------|--------------|---------------|--------|----------|--------------------------|-----------------------|
| <b>Composite of CVD</b> |              |               |        |          |                          |                       |
| Non-users               | 38,519       | 1,399         | (3.63) | 198.6    | 1.00 (Reference)         | 1.00 (Reference)      |
| SERMs                   | 61,457       | 1,612         | (2.62) | 320.5    | 1.07 (0.99-1.14)         | 1.14 (1.06-1.23)      |
| AIs                     | 24,714       | 1,118         | (4.52) | 121.9    | 0.99 (0.92-1.07)         | 1.04 (0.96-1.13)      |
| Both                    | 8,481        | 272           | (3.21) | 60.6     | 1.15 (1.01-1.32)         | 1.18 (1.04-1.35)      |
| <b>Stroke</b>           |              |               |        |          |                          |                       |
| Non-users               | 38,519       | 352           | (0.91) | 198.6    | 1.00 (Reference)         | 1.00 (Reference)      |
| SERMs                   | 61,457       | 369           | (0.60) | 320.5    | 1.13 (0.98-1.31)         | 1.18 (1.02-1.37)      |
| AIs                     | 24,714       | 330           | (1.34) | 121.9    | 1.03 (0.89-1.20)         | 1.10 (0.95-1.29)      |
| Both                    | 8,481        | 65            | (0.77) | 60.6     | 1.11 (0.85-1.45)         | 1.12 (0.86-1.47)      |
| <b>CHD</b>              |              |               |        |          |                          |                       |
| Non-users               | 38,519       | 434           | (1.13) | 198.6    | 1.00 (Reference)         | 1.00 (Reference)      |
| SERMs                   | 61,457       | 482           | (0.78) | 320.5    | 1.01 (0.89-1.15)         | 1.02 (0.89-1.16)      |
| AIs                     | 24,714       | 382           | (1.55) | 121.9    | 1.10 (0.96-1.27)         | 1.14 (0.99-1.31)      |
| Both                    | 8,481        | 80            | (0.94) | 60.6     | 1.08 (0.85-1.37)         | 1.08 (0.85-1.38)      |
| <b>VTE</b>              |              |               |        |          |                          |                       |
| Non-users               | 38,519       | 99            | (0.26) | 198.6    | 1.00 (Reference)         | 1.00 (Reference)      |
| SERMs                   | 61,457       | 168           | (0.27) | 320.5    | 1.44 (1.12-1.85)         | 1.58 (1.22-2.04)      |
| AIs                     | 24,714       | 67            | (0.27) | 121.9    | 0.92 (0.68-1.25)         | 0.98 (0.71-1.33)      |
| Both                    | 8,481        | 25            | (0.29) | 60.6     | 1.57 (1.00-2.45)         | 1.62 (1.03-2.54)      |
| <b>HF</b>               |              |               |        |          |                          |                       |
| Non-users               | 38,519       | 241           | (0.63) | 198.6    | 1.00 (Reference)         | 1.00 (Reference)      |
| SERMs                   | 61,457       | 220           | (0.36) | 320.5    | 0.79 (0.66-0.95)         | 1.02 (0.85-1.23)      |
| AIs                     | 24,714       | 145           | (0.59) | 121.9    | 0.85 (0.69-1.04)         | 0.94 (0.76-1.16)      |
| Both                    | 8,481        | 47            | (0.55) | 60.6     | 1.33 (0.97-1.83)         | 1.49 (1.08-2.05)      |
| <b>Arrhythmia</b>       |              |               |        |          |                          |                       |
| Non-users               | 38,519       | 274           | (0.71) | 198.6    | 1.00 (Reference)         | 1.00 (Reference)      |
| SERMs                   | 61,457       | 373           | (0.61) | 320.5    | 1.02 (0.85-1.23)         | 1.16 (0.99-1.37)      |
| AIs                     | 24,714       | 196           | (0.79) | 121.9    | 0.94 (0.76-1.16)         | 0.96 (0.79-1.15)      |
| Both                    | 8,481        | 55            | (0.65) | 60.6     | 1.49 (1.08-2.05)         | 1.09 (0.81-1.46)      |
| <b>T2DM</b>             |              |               |        |          |                          |                       |
| Non-users               | 38,519       | 1,659         | (4.31) | 198.6    | 1.00 (Reference)         | 1.00 (Reference)      |
| SERMs                   | 61,457       | 2,203         | (3.58) | 320.5    | 1.14 (0.98-1.34)         | 1.21 (1.13-1.29)      |
| AIs                     | 24,714       | 1,445         | (5.85) | 121.9    | 0.95 (0.79-1.14)         | 1.14 (1.06-1.22)      |
| Both                    | 8,481        | 377           | (4.45) | 60.6     | 1.10 (0.82-1.47)         | 1.31 (1.17-1.46)      |

AIs, aromatase inhibitors; CHD, coronary heart diseases; CI, confidence intervals; CVD, cardiovascular diseases; HF, heart failure; HR, hazard ratio; PY, person-years; SERMs, selective estrogen receptor modulators; T2DM, type 2 diabetes mellitus; VTE, venous thromboembolism. \*Adjusted for age at diagnosis, income level, region of residence, histological subtype, surgery, chemotherapy, radiotherapy, trastuzumab, hypertension, dyslipidemia, osteoporosis, and T2DM (or CVDs).

Table S16. The sensitivity analysis in the health screening subjects

|                  | No. of total | No. of events | (%)    | 1,000 PY | Age-adjusted HR (95% CI) | Adjusted HR (95% CI)* | Adjusted HR (95% CI)† |  |  |
|------------------|--------------|---------------|--------|----------|--------------------------|-----------------------|-----------------------|--|--|
| Composite of CVD |              |               |        |          |                          |                       |                       |  |  |
| Non-users        | 18,030       | 540           | (3.00) | 81.0     | 1.00 (Reference)         | 1.00 (Reference)      | 1.00 (Reference)      |  |  |
| SERMs            | 33,407       | 672           | (2.01) | 151.9    | 0.99 (0.89-1.11)         | 1.06 (0.94-1.19)      | 1.06 (0.94-1.19)      |  |  |
| AIs              | 15,341       | 561           | (3.66) | 66.3     | 1.08 (0.96-1.21)         | 1.12 (0.99-1.26)      | 1.12 (0.99-1.27)      |  |  |
| Both             | 5,285        | 146           | (2.76) | 33.7     | 1.10 (0.91-1.33)         | 1.12 (0.93-1.36)      | 1.12 (0.93-1.36)      |  |  |
| Stroke           |              |               |        |          |                          |                       |                       |  |  |
| Non-users        | 18,030       | 129           | (0.72) | 81.0     | 1.00 (Reference)         | 1.00 (Reference)      | 1.00 (Reference)      |  |  |
| SERMs            | 33,407       | 139           | (0.42) | 151.9    | 1.01 (0.79-1.28)         | 1.03 (0.81-1.32)      | 1.02 (0.80-1.31)      |  |  |
| AIs              | 15,341       | 152           | (0.99) | 66.3     | 1.09 (0.87-1.38)         | 1.15 (0.90-1.46)      | 1.16 (0.91-1.48)      |  |  |
| Both             | 5,285        | 33            | (0.62) | 33.7     | 1.04 (0.71-1.54)         | 1.04 (0.71-1.54)      | 1.04 (0.71-1.54)      |  |  |
| CHD              |              |               |        |          |                          |                       |                       |  |  |
| Non-users        | 18,030       | 176           | (0.98) | 81.0     | 1.00 (Reference)         | 1.00 (Reference)      | 1.00 (Reference)      |  |  |
| SERMs            | 33,407       | 215           | (0.64) | 151.9    | 0.96 (0.79-1.18)         | 0.94 (0.77-1.16)      | 0.96 (0.78-1.18)      |  |  |
| AIs              | 15,341       | 179           | (1.17) | 66.3     | 1.09 (0.89-1.34)         | 1.10 (0.89-1.36)      | 1.09 (0.88-1.35)      |  |  |
| Both             | 5,285        | 48            | (0.91) | 33.7     | 1.11 (0.80-1.53)         | 1.10 (0.79-1.52)      | 1.11 (0.80-1.54)      |  |  |
| VTE              |              |               |        |          |                          |                       |                       |  |  |
| Non-users        | 18,030       | 36            | (0.20) | 81.0     | 1.00 (Reference)         | 1.00 (Reference)      | 1.00 (Reference)      |  |  |
| SERMs            | 33,407       | 70            | (0.21) | 151.9    | 1.56 (1.04-2.34)         | 1.70 (1.11-2.59)      | 1.66 (1.09-2.54)      |  |  |
| AIs              | 15,341       | 36            | (0.23) | 66.3     | 1.07 (0.68-1.69)         | 1.11 (0.70-1.77)      | 1.13 (0.71-1.81)      |  |  |
| Both             | 5,285        | 14            | (0.26) | 33.7     | 1.67 (0.89-3.13)         | 1.74 (0.92-3.27)      | 1.73 (0.92-3.25)      |  |  |
| HF               |              |               |        |          |                          |                       |                       |  |  |
| Non-users        | 18,030       | 90            | (0.50) | 81.0     | 1.00 (Reference)         | 1.00 (Reference)      | 1.00 (Reference)      |  |  |
| SERMs            | 33,407       | 80            | (0.24) | 151.9    | 0.65 (0.48-0.87)         | 0.94 (0.69-1.28)      | 0.91 (0.66-1.25)      |  |  |
| AIs              | 15,341       | 85            | (0.55) | 66.3     | 1.04 (0.78-1.40)         | 1.20 (0.88-1.62)      | 1.22 (0.90-1.65)      |  |  |
| Both             | 5,285        | 20            | (0.38) | 33.7     | 1.04 (0.63-1.70)         | 1.22 (0.74-2.01)      | 1.21 (0.73-1.99)      |  |  |
| Arrhythmia       |              |               |        |          |                          |                       |                       |  |  |
| Non-users        | 18,030       | 109           | (0.60) | 81.0     | 1.00 (Reference)         | 1.00 (Reference)      | 1.00 (Reference)      |  |  |
| SERMs            | 33,407       | 168           | (0.50) | 151.9    | 1.10 (0.86-1.40)         | 1.12 (0.87-1.44)      | 1.12 (0.87-1.44)      |  |  |
| AIs              | 15,341       | 110           | (0.72) | 66.3     | 1.11 (0.85-1.45)         | 1.09 (0.83-1.43)      | 1.09 (0.83-1.43)      |  |  |
| Both             | 5,285        | 31            | (0.59) | 33.7     | 1.06 (0.70-1.58)         | 1.02 (0.68-1.53)      | 1.02 (0.68-1.53)      |  |  |
| T2DM             |              |               |        |          |                          |                       |                       |  |  |
| Non-users        | 18,030       | 659           | (3.66) | 81.0     | 1.00 (Reference)         | 1.00 (Reference)      | 1.00 (Reference)      |  |  |

|       |        |     |        |       |      |             |      |             |      |             |
|-------|--------|-----|--------|-------|------|-------------|------|-------------|------|-------------|
| SERMs | 33,407 | 987 | (2.95) | 151.9 | 1.16 | (1.05-1.28) | 1.21 | (1.10-1.34) | 1.22 | (1.10-1.35) |
| AIs   | 15,341 | 752 | (4.90) | 66.3  | 1.22 | (1.10-1.35) | 1.21 | (1.09-1.35) | 1.21 | (1.08-1.34) |
| Both  | 5,285  | 206 | (3.90) | 33.7  | 1.25 | (1.07-1.47) | 1.26 | (1.07-1.47) | 1.26 | (1.07-1.48) |

AIs, aromatase inhibitors; CHD, coronary heart diseases; CI, confidence intervals; CVD, cardiovascular diseases; HF, heart failure; HR, hazard ratio; PY, person-years; SERMs, selective estrogen receptor modulators; T2DM, type 2 diabetes mellitus; VTE, venous thromboembolism. \*Adjusted for age at diagnosis, income level, region of residence, histological subtype, surgery, chemotherapy, radiotherapy, trastuzumab, hypertension, dyslipidemia, osteoporosis, and (T2DM or CVDs). †Additionally adjusted for BMI, smoking, alcohol consumption, physical activity, and menopausal status.

Table S17. The sensitivity analysis in patients with previous history of CVDs

|                         | Overall      |               |        |          |                       |             | with previous history of CVD |               |         |          |                       |             |
|-------------------------|--------------|---------------|--------|----------|-----------------------|-------------|------------------------------|---------------|---------|----------|-----------------------|-------------|
|                         | No. of total | No. of events | (%)    | 1,000 PY | Adjusted HR (95% CI)* |             | No. of total                 | No. of events | (%)     | 1,000 PY | Adjusted HR (95% CI)* |             |
| <b>Composite of CVD</b> |              |               |        |          |                       |             |                              |               |         |          |                       |             |
| Non-users               | 36,699       | 1,339         | (3.65) | 190.0    | 1.00                  | (Reference) | 1,583                        | 333           | (21.04) | 6.4      | 1.00                  | (Reference) |
| SERMs                   | 61,195       | 1,526         | (2.49) | 318.0    | 1.13                  | (1.05-1.21) | 1,728                        | 356           | (20.60) | 7.3      | 1.18                  | (1.02-1.38) |
| AIs                     | 24,633       | 1,159         | (4.71) | 120.2    | 1.14                  | (1.05-1.23) | 1,858                        | 383           | (20.61) | 7.5      | 1.06                  | (0.91-1.23) |
| Both                    | 10,644       | 377           | (3.54) | 73.4     | 1.24                  | (1.10-1.39) | 431                          | 76            | (17.63) | 2.3      | 1.10                  | (0.85-1.42) |
| <b>Stroke</b>           |              |               |        |          |                       |             |                              |               |         |          |                       |             |
| Non-users               | 36,699       | 335           | (0.91) | 190.0    | 1.00                  | (Reference) | 1,583                        | 80            | (5.05)  | 6.4      | 1.00                  | (Reference) |
| SERMs                   | 61,195       | 356           | (0.58) | 318.0    | 1.20                  | (1.04-1.40) | 1,728                        | 88            | (5.09)  | 7.3      | 1.41                  | (1.03-1.92) |
| AIs                     | 24,633       | 337           | (1.37) | 120.2    | 1.16                  | (0.99-1.35) | 1,858                        | 99            | (5.33)  | 7.5      | 1.19                  | (0.88-1.60) |
| Both                    | 10,644       | 88            | (0.83) | 73.4     | 1.13                  | (0.89-1.44) | 431                          | 21            | (4.87)  | 2.3      | 1.31                  | (0.80-2.14) |
| <b>CHD</b>              |              |               |        |          |                       |             |                              |               |         |          |                       |             |
| Non-users               | 36,699       | 414           | (1.13) | 190.0    | 1.00                  | (Reference) | 1,583                        | 146           | (9.22)  | 6.4      | 1.00                  | (Reference) |
| SERMs                   | 61,195       | 465           | (0.76) | 318.0    | 1.03                  | (0.90-1.18) | 1,728                        | 126           | (7.29)  | 7.3      | 0.98                  | (0.77-1.26) |
| AIs                     | 24,633       | 389           | (1.58) | 120.2    | 1.22                  | (1.06-1.41) | 1,858                        | 165           | (8.88)  | 7.5      | 1.03                  | (0.82-1.29) |
| Both                    | 10,644       | 110           | (1.03) | 73.4     | 1.14                  | (0.92-1.42) | 431                          | 32            | (7.42)  | 2.3      | 1.03                  | (0.70-1.52) |
| <b>VTE</b>              |              |               |        |          |                       |             |                              |               |         |          |                       |             |
| Non-users               | 36,699       | 96            | (0.26) | 190.0    | 1.00                  | (Reference) | 1,583                        | 14            | (0.88)  | 6.4      | 1.00                  | (Reference) |
| SERMs                   | 61,195       | 154           | (0.25) | 318.0    | 1.47                  | (1.13-1.90) | 1,728                        | 8             | (0.46)  | 7.3      | 0.67                  | (0.26-1.69) |
| AIs                     | 24,633       | 74            | (0.30) | 120.2    | 1.17                  | (0.86-1.58) | 1,858                        | 10            | (0.54)  | 7.5      | 0.82                  | (0.37-1.83) |
| Both                    | 10,644       | 35            | (0.33) | 73.4     | 1.72                  | (1.15-2.55) | 431                          | 2             | (0.46)  | 2.3      | 0.84                  | (0.19-3.77) |
| <b>HF</b>               |              |               |        |          |                       |             |                              |               |         |          |                       |             |
| Non-users               | 36,699       | 231           | (0.63) | 190.0    | 1.00                  | (Reference) | 1,583                        | 26            | (1.64)  | 6.4      | 1.00                  | (Reference) |
| SERMs                   | 61,195       | 206           | (0.34) | 318.0    | 0.98                  | (0.81-1.18) | 1,728                        | 29            | (1.68)  | 7.3      | 1.78                  | (1.03-3.07) |
| AIs                     | 24,633       | 156           | (0.63) | 120.2    | 1.05                  | (0.85-1.29) | 1,858                        | 27            | (1.45)  | 7.5      | 0.90                  | (0.51-1.57) |
| Both                    | 10,644       | 60            | (0.56) | 73.4     | 1.41                  | (1.05-1.89) | 431                          | 4             | (0.93)  | 2.3      | 0.82                  | (0.28-2.40) |

Arrhythmia

|           |        |     |        |       |      |             |       |     |        |     |      |             |
|-----------|--------|-----|--------|-------|------|-------------|-------|-----|--------|-----|------|-------------|
| Non-users | 36,699 | 263 | (0.72) | 190.0 | 1.00 | (Reference) | 1,583 | 68  | (4.30) | 6.4 | 1.00 | (Reference) |
| SERMs     | 61,195 | 346 | (0.57) | 318.0 | 1.14 | (0.97-1.34) | 1,728 | 105 | (6.08) | 7.3 | 1.21 | (0.88-1.67) |
| AIs       | 24,633 | 205 | (0.83) | 120.2 | 1.08 | (0.90-1.30) | 1,858 | 83  | (4.47) | 7.5 | 1.18 | (0.85-1.64) |
| Both      | 10,644 | 84  | (0.79) | 73.4  | 1.28 | (0.99-1.64) | 431   | 17  | (3.94) | 2.3 | 1.18 | (0.69-2.03) |

AIs, aromatase inhibitors; CHD, coronary heart diseases; CI, confidence intervals; CVD, cardiovascular diseases; HF, heart failure; HR, hazard ratio; PY, person-years; SERMs, selective estrogen receptor modulators; T2DM, type 2 diabetes mellitus; VTE, venous thromboembolism. \*Adjusted for age at diagnosis, income level, region of residence, histological subtype, surgery, chemotherapy, radiotherapy, trastuzumab, hypertension, dyslipidemia, osteoporosis, and T2DM (or CVDs).



Table S18. Baseline characteristics of study population after PSM; SERMs vs. non-users

|                             | Non-users<br>(N=31,022, 50.0%) |        | SERMs<br>(N=31,022, 50.0%) |        | SMD   |
|-----------------------------|--------------------------------|--------|----------------------------|--------|-------|
| Age at diagnosis (mean, SD) | 48.0                           | (9.8)  | 47.3                       | (9.8)  | -0.08 |
| <40                         | 6,038                          | (19.5) | 5,800                      | (18.7) |       |
| 40-49                       | 11,652                         | (37.6) | 15,192                     | (49.0) |       |
| 50-59                       | 9,948                          | (32.1) | 6,789                      | (21.9) |       |
| 60-69                       | 2,578                          | (8.3)  | 2,032                      | (6.6)  |       |
| ≥70                         | 806                            | (2.6)  | 1,209                      | (3.9)  |       |
| Insurance based income      |                                |        |                            |        |       |
| 1st (lowest)                | 7,565                          | (24.4) | 7,652                      | (24.7) | 0.01  |
| 2nd                         | 5,991                          | (19.3) | 6,011                      | (19.4) |       |
| 3rd                         | 7,358                          | (23.7) | 7,486                      | (24.1) |       |
| 4rd (highest)               | 10,108                         | (32.6) | 9,873                      | (31.8) |       |
| Region of residence         |                                |        |                            |        |       |
| Metropolitan                | 15,387                         | (49.6) | 15,094                     | (48.7) | -0.02 |
| Urban                       | 6,866                          | (22.1) | 6,996                      | (22.6) |       |
| Rural                       | 8,684                          | (28.0) | 8,842                      | (28.5) |       |
| Histological type           |                                |        |                            |        |       |
| Invasive                    | 27,661                         | (89.2) | 27,367                     | (88.2) | -0.03 |
| <i>In situ</i>              | 3,361                          | (10.8) | 3,655                      | (11.8) |       |
| Surgery                     |                                |        |                            |        |       |
| No                          | 5,185                          | (16.7) | 5,180                      | (16.7) | 0.00  |
| Yes                         | 25,837                         | (83.3) | 25,842                     | (83.3) |       |
| Chemotherapy                |                                |        |                            |        |       |
| No                          | 10,286                         | (33.2) | 9,626                      | (31.0) | 0.05  |
| Yes                         | 20,736                         | (66.8) | 21,396                     | (69.0) |       |
| Radiotherapy                |                                |        |                            |        |       |
| No                          | 12,035                         | (38.8) | 12,491                     | (40.3) | -0.03 |
| Yes                         | 18,987                         | (61.2) | 18,531                     | (59.7) |       |
| Trastuzumab                 |                                |        |                            |        |       |
| No                          | 27,653                         | (89.1) | 27,035                     | (87.1) | 0.06  |
| Yes                         | 3,369                          | (10.9) | 3,987                      | (12.9) |       |
| Hypertension                |                                |        |                            |        |       |
| No                          | 27,887                         | (89.9) | 27,964                     | (90.1) | -0.01 |
| Yes                         | 3,135                          | (10.1) | 3,058                      | (9.9)  |       |
| Dyslipidemia                |                                |        |                            |        |       |
| No                          | 28,701                         | (92.5) | 28,681                     | (92.5) | <0.01 |
| Yes                         | 2,321                          | (7.5)  | 2,341                      | (7.5)  |       |
| Osteoporosis                |                                |        |                            |        |       |
| No                          | 28,964                         | (93.4) | 28,956                     | (93.3) | <0.01 |
| Yes                         | 2,058                          | (6.6)  | 2,066                      | (6.7)  |       |

PSM, propensity score matching; SERMs, selective estrogen receptor modulators; SMD, standardized mean difference. If SMD >0.1, the covariate has the poor balance.

Table S19. Baseline characteristics of study population after PSM; AIs vs. non-users

|                             | Non-users<br>(N=17,336, 50.0%) |        | AIs<br>(N=17,336, 50.0%) |        | SMD   |
|-----------------------------|--------------------------------|--------|--------------------------|--------|-------|
| Age at diagnosis (mean, SD) | 57.5                           | (8.8)  | 56.6                     | (7.5)  | -0.06 |
| <40                         | 179                            | (1.0)  | 90                       | (0.5)  |       |
| 40-49                       | 2,605                          | (15.0) | 2,036                    | (11.7) |       |
| 50-59                       | 8,944                          | (51.6) | 10,254                   | (59.1) |       |
| 60-69                       | 3,932                          | (22.7) | 3,797                    | (21.9) |       |
| ≥70                         | 1,676                          | (9.7)  | 1,159                    | (6.7)  |       |
| Insurance based income      |                                |        |                          |        |       |
| 1st (lowest)                | 4,565                          | (26.3) | 4,425                    | (25.5) | -0.02 |
| 2nd                         | 3,296                          | (19.0) | 3,242                    | (18.7) |       |
| 3rd                         | 3,972                          | (22.9) | 3,988                    | (23.0) |       |
| 4rd (highest)               | 5,503                          | (31.7) | 5,681                    | (32.8) |       |
| Region of residence         |                                |        |                          |        |       |
| Metropolitan                | 8,894                          | (51.3) | 8,898                    | (51.3) | <0.01 |
| Urban                       | 3,281                          | (18.9) | 3,394                    | (19.6) |       |
| Rural                       | 5,128                          | (29.6) | 5,012                    | (28.9) |       |
| Histological type           |                                |        |                          |        |       |
| Invasive                    | 17,236                         | (99.4) | 17,233                   | (99.4) | <0.01 |
| <i>In situ</i>              | 100                            | (0.6)  | 103                      | (0.6)  |       |
| Surgery                     |                                |        |                          |        |       |
| No                          | 2,493                          | (14.4) | 2,205                    | (12.7) | 0.05  |
| Yes                         | 14,843                         | (85.6) | 15,131                   | (87.3) |       |
| Chemotherapy                |                                |        |                          |        |       |
| No                          | 4,430                          | (25.6) | 4,529                    | (26.1) | -0.01 |
| Yes                         | 12,906                         | (74.4) | 12,807                   | (73.9) |       |
| Radiotherapy                |                                |        |                          |        |       |
| No                          | 6,387                          | (36.8) | 5,955                    | (34.4) | 0.05  |
| Yes                         | 10,949                         | (63.2) | 11,381                   | (65.6) |       |
| Trastuzumab                 |                                |        |                          |        |       |
| No                          | 1,485                          | (8.6)  | 15,152                   | (87.4) | -0.06 |
| Yes                         | 2,531                          | (14.6) | 2,184                    | (12.6) |       |
| Hypertension                |                                |        |                          |        |       |
| No                          | 13,768                         | (79.4) | 13,584                   | (78.4) | 0.03  |
| Yes                         | 3,568                          | (20.6) | 3,752                    | (21.6) |       |
| Dyslipidemia                |                                |        |                          |        |       |
| No                          | 14,973                         | (86.4) | 14,899                   | (85.9) | 0.01  |
| Yes                         | 2,363                          | (13.6) | 2,437                    | (14.1) |       |
| Osteoporosis                |                                |        |                          |        |       |
| No                          | 15,355                         | (88.6) | 15,396                   | (88.8) | -0.01 |
| Yes                         | 1,981                          | (11.4) | 1,940                    | (11.2) |       |

PSM, propensity score matching; AIs, aromatase inhibitors; SMD, standardized mean difference. If SMD >0.1, the covariate has the poor balance.

Table S20. Baseline characteristics of study population after PSM; AIs vs. SERMs

|                             | SERMs             |        | AIs               |        | SMD   |
|-----------------------------|-------------------|--------|-------------------|--------|-------|
|                             | (N=11,209, 50.0%) |        | (N=11,209, 50.0%) |        |       |
| Age at diagnosis (mean, SD) | 55.2              | (8.9)  | 55.2              | (8.4)  | 0.01  |
| <40                         | 105               | (0.9)  | 90                | (0.8)  |       |
| 40-49                       | 2,406             | (21.5) | 2,046             | (18.3) |       |
| 50-59                       | 6,052             | (54.0) | 6,519             | (58.2) |       |
| 60-69                       | 1,588             | (14.2) | 1,633             | (14.6) |       |
| ≥70                         | 1,058             | (9.4)  | 921               | (8.2)  |       |
| Insurance based income      |                   |        |                   |        |       |
| 1st (lowest)                | 2,914             | (26.0) | 2,888             | (25.8) | -0.01 |
| 2nd                         | 2,223             | (19.8) | 2,103             | (18.8) |       |
| 3rd                         | 2,462             | (22.0) | 2,422             | (21.6) |       |
| 4rd (highest)               | 3,610             | (32.2) | 3,796             | (33.9) |       |
| Region of residence         |                   |        |                   |        |       |
| Metropolitan                | 5,468             | (48.8) | 5,493             | (49.0) | <0.01 |
| Urban                       | 2,356             | (21.0) | 2,388             | (21.3) |       |
| Rural                       | 3,358             | (30.0) | 3,303             | (29.5) |       |
| Histological type           |                   |        |                   |        |       |
| Invasive                    | 11,072            | (98.8) | 11,108            | (99.1) | 0.03  |
| <i>In situ</i>              | 137               | (1.2)  | 101               | (0.9)  |       |
| Surgery                     |                   |        |                   |        |       |
| No                          | 1,551             | (13.8) | 1,451             | (12.9) | 0.03  |
| Yes                         | 9,658             | (86.2) | 9,758             | (87.1) |       |
| Chemotherapy                |                   |        |                   |        |       |
| No                          | 3,808             | (34.0) | 4,120             | (36.8) | -0.06 |
| Yes                         | 7,401             | (66.0) | 7,089             | (63.2) |       |
| Radiotherapy                |                   |        |                   |        |       |
| No                          | 3,795             | (33.9) | 3,964             | (35.4) | -0.03 |
| Yes                         | 7,414             | (66.1) | 7,245             | (64.6) |       |
| Trastuzumab                 |                   |        |                   |        |       |
| No                          | 10,148            | (90.5) | 10,248            | (91.4) | -0.03 |
| Yes                         | 1,061             | (9.5)  | 961               | (8.6)  |       |
| Hypertension                |                   |        |                   |        |       |
| No                          | 9,126             | (81.4) | 9,075             | (81.0) | 0.01  |
| Yes                         | 2,083             | (18.6) | 2,134             | (19.0) |       |
| Dyslipidemia                |                   |        |                   |        |       |
| No                          | 9,807             | (87.5) | 9,946             | (88.7) | -0.04 |
| Yes                         | 1,402             | (12.5) | 1,263             | (11.3) |       |
| Osteoporosis                |                   |        |                   |        |       |
| No                          | 10,062            | (89.8) | 10,112            | (90.2) | -0.01 |
| Yes                         | 1,147             | (10.2) | 1,097             | (9.8)  |       |

PSM, propensity score matching; SERMs, selective estrogen receptor modulators; AIs, aromatase inhibitors; SMD, standardized mean difference. If SMD >0.1, the covariate has the poor balance.

Table S21. The comparison of results between before and after PSM (SERMs vs. non-users)

|                  | Before PSM (Main findings) |               |        |          |                  |              | After PSM     |        |          |                  |  |  |
|------------------|----------------------------|---------------|--------|----------|------------------|--------------|---------------|--------|----------|------------------|--|--|
|                  | No. of total               | No. of events | (%)    | 1,000 PY | HR (95% CI)*     | No. of total | No. of events | (%)    | 1,000 PY | HR (95% CI)†     |  |  |
| Composite of CVD |                            |               |        |          |                  |              |               |        |          |                  |  |  |
| Non-users        | 36,699                     | 1,339         | (3.65) | 190.0    | 1.00 (Reference) | 31,022       | 965           | (3.11) | 164.0    | 1.00 (Reference) |  |  |
| SERMs            | 61,195                     | 1,526         | (2.49) | 318.0    | 1.13 (1.05-1.21) | 31,022       | 1,009         | (3.25) | 164.7    | 1.02 (0.91-1.15) |  |  |
| Stroke           |                            |               |        |          |                  |              |               |        |          |                  |  |  |
| Non-users        | 36,699                     | 335           | (0.91) | 190.0    | 1.00 (Reference) | 31,022       | 216           | (0.70) | 164.0    | 1.00 (Reference) |  |  |
| SERMs            | 61,195                     | 356           | (0.58) | 318.0    | 1.20 (1.04-1.40) | 31,022       | 265           | (0.85) | 164.7    | 1.15 (0.91-1.46) |  |  |
| CHD              |                            |               |        |          |                  |              |               |        |          |                  |  |  |
| Non-users        | 36,699                     | 414           | (1.13) | 190.0    | 1.00 (Reference) | 31,022       | 315           | (1.02) | 164.0    | 1.00 (Reference) |  |  |
| SERMs            | 61,195                     | 465           | (0.76) | 318.0    | 1.03 (0.90-1.18) | 31,022       | 303           | (0.98) | 164.7    | 0.98 (0.78-1.23) |  |  |
| VTE              |                            |               |        |          |                  |              |               |        |          |                  |  |  |
| Non-users        | 36,699                     | 96            | (0.26) | 190.0    | 1.00 (Reference) | 31,022       | 68            | (0.22) | 164.0    | 1.00 (Reference) |  |  |
| SERMs            | 61,195                     | 154           | (0.25) | 318.0    | 1.47 (1.13-1.90) | 31,022       | 86            | (0.28) | 164.7    | 1.60 (1.05-2.44) |  |  |
| HF               |                            |               |        |          |                  |              |               |        |          |                  |  |  |
| Non-users        | 36,699                     | 231           | (0.63) | 190.0    | 1.00 (Reference) | 31,022       | 162           | (0.52) | 164.0    | 1.00 (Reference) |  |  |
| SERMs            | 61,195                     | 206           | (0.34) | 318.0    | 0.98 (0.81-1.18) | 31,022       | 153           | (0.49) | 164.7    | 0.87 (0.66-1.14) |  |  |
| Arrhythmia       |                            |               |        |          |                  |              |               |        |          |                  |  |  |
| Non-users        | 36,699                     | 263           | (0.72) | 190.0    | 1.00 (Reference) | 31,022       | 204           | (0.66) | 164.0    | 1.00 (Reference) |  |  |
| SERMs            | 61,195                     | 346           | (0.57) | 318.0    | 1.14 (0.97-1.34) | 31,022       | 203           | (0.65) | 164.7    | 0.93 (0.71-1.22) |  |  |
| T2DM             |                            |               |        |          |                  |              |               |        |          |                  |  |  |
| Non-users        | 36,699                     | 1,581         | (4.31) | 190.0    | 1.00 (Reference) | 31,022       | 1,216         | (3.92) | 164.0    | 1.00 (Reference) |  |  |
| SERMs            | 61,195                     | 2,136         | (3.49) | 318.0    | 1.22 (1.14-1.30) | 31,022       | 1,397         | (4.50) | 164.7    | 1.25 (1.13-1.39) |  |  |

PSM, propensity score matching; PY, person-years; SERMs, selective estrogen receptor modulators; CVD, cardiovascular diseases; CHD, coronary heart diseases; VTE, venous thromboembolism; HF, heart failure; T2DM, type 2 diabetes mellitus; \*Adjusted for age, insurance based income, region of residence, histological type, surgery, chemotherapy, radiotherapy, trastuzumab, hypertension, dyslipidemia, osteoporosis, and T2DM (of CVDs). †Non-users and SERMs users were matched as the 1:1 ratio according to age, insurance based income, region of residence, histological type, surgery, chemotherapy, radiotherapy, trastuzumab, hypertension, dyslipidemia, and osteoporosis using the PSM, and T2DM (or CVDs) was added in the adjusted model

Table S22. The comparison of results between before and after PSM (AIs vs. non-users)

|                  | Before PSM (Main findings) |               |        |          |              |             | After PSM    |               |        |          |              |             |
|------------------|----------------------------|---------------|--------|----------|--------------|-------------|--------------|---------------|--------|----------|--------------|-------------|
|                  | No. of total               | No. of events | (%)    | 1,000 PY | HR (95% CI)* |             | No. of total | No. of events | (%)    | 1,000 PY | HR (95% CI)† |             |
| Composite of CVD |                            |               |        |          |              |             |              |               |        |          |              |             |
| Non-users        | 36,699                     | 1,339         | (3.65) | 190.0    | 1.00         | (Reference) | 17,336       | 870           | (5.02) | 87.2     | 1.00         | (Reference) |
| AIs              | 24,633                     | 1,159         | (4.71) | 120.2    | 1.14         | (1.05-1.23) | 17,336       | 762           | (4.40) | 87.0     | 0.92         | (0.81-1.04) |
| Stroke           |                            |               |        |          |              |             |              |               |        |          |              |             |
| Non-users        | 36,699                     | 335           | (0.91) | 190.0    | 1.00         | (Reference) | 17,336       | 256           | (1.48) | 87.2     | 1.00         | (Reference) |
| AIs              | 24,633                     | 337           | (1.37) | 120.2    | 1.16         | (0.99-1.35) | 17,336       | 209           | (1.21) | 87.0     | 0.79         | (0.61-1.01) |
| CHD              |                            |               |        |          |              |             |              |               |        |          |              |             |
| Non-users        | 36,699                     | 414           | (1.13) | 190.0    | 1.00         | (Reference) | 17,336       | 269           | (1.55) | 87.2     | 1.00         | (Reference) |
| AIs              | 24,633                     | 389           | (1.58) | 120.2    | 1.22         | (1.06-1.41) | 17,336       | 262           | (1.51) | 87.0     | 1.00         | (0.80-1.24) |
| VTE              |                            |               |        |          |              |             |              |               |        |          |              |             |
| Non-users        | 36,699                     | 96            | (0.26) | 190.0    | 1.00         | (Reference) | 17,336       | 61            | (0.35) | 87.2     | 1.00         | (Reference) |
| AIs              | 24,633                     | 74            | (0.30) | 120.2    | 1.17         | (0.86-1.58) | 17,336       | 49            | (0.28) | 87.0     | 0.96         | (0.58-1.59) |
| HF               |                            |               |        |          |              |             |              |               |        |          |              |             |
| Non-users        | 36,699                     | 231           | (0.63) | 190.0    | 1.00         | (Reference) | 17,336       | 126           | (0.73) | 87.2     | 1.00         | (Reference) |
| AIs              | 24,633                     | 156           | (0.63) | 120.2    | 1.05         | (0.85-1.29) | 17,336       | 110           | (0.63) | 87.0     | 0.90         | (0.66-1.24) |
| Arrhythmia       |                            |               |        |          |              |             |              |               |        |          |              |             |
| Non-users        | 36,699                     | 263           | (0.72) | 190.0    | 1.00         | (Reference) | 17,336       | 158           | (0.91) | 87.2     | 1.00         | (Reference) |
| AIs              | 24,633                     | 205           | (0.83) | 120.2    | 1.08         | (0.90-1.30) | 17,336       | 133           | (0.77) | 87.0     | 1.05         | (0.77-1.42) |
| T2DM             |                            |               |        |          |              |             |              |               |        |          |              |             |
| Non-users        | 36,699                     | 1,581         | (4.31) | 190.0    | 1.00         | (Reference) | 17,336       | 1,015         | (5.85) | 87.2     | 1.00         | (Reference) |
| AIs              | 24,633                     | 1,490         | (6.05) | 120.2    | 1.22         | (1.14-1.31) | 17,336       | 1,021         | (5.89) | 87.0     | 1.03         | (0.92-1.16) |

PSM, propensity score matching; PY, person-years; AIs, aromatase inhibitors; CVD, cardiovascular diseases; CHD, coronary heart diseases; VTE, venous thromboembolism; HF, heart failure; T2DM, type 2 diabetes mellitus; \*Adjusted for age, insurance based income, region of residence, histological type, surgery, chemotherapy, radiotherapy, trastuzumab, hypertension, dyslipidemia, osteoporosis, and T2DM (or CVDs). †Non-users and AIs users were matched as the 1:1 ratio according to age, insurance based income, region of residence, histological type, surgery, chemotherapy, radiotherapy, trastuzumab, hypertension, dyslipidemia, and osteoporosis using the PSM, and T2DM (or CVDs) was added in the adjusted model

Table S23. The comparison of results between before and after PSM (AIs vs. SERMs)

|                  | Before PSM (Main findings) |               |        |          |              |             | After PSM    |               |        |          |              |             |
|------------------|----------------------------|---------------|--------|----------|--------------|-------------|--------------|---------------|--------|----------|--------------|-------------|
|                  | No. of total               | No. of events | (%)    | 1,000 PY | HR (95% CI)* |             | No. of total | No. of events | (%)    | 1,000 PY | HR (95% CI)† |             |
| Composite of CVD |                            |               |        |          |              |             |              |               |        |          |              |             |
| SERMs            | 61,195                     | 1,526         | (2.49) | 318.0    | 1.00         | (Reference) | 11,209       | 564           | (5.03) | 55.7     | 1.00         | (Reference) |
| AIs              | 24,633                     | 1,159         | (4.71) | 120.2    | 1.01         | (0.93-1.09) | 11,209       | 462           | (4.12) | 58.1     | 0.94         | (0.80-1.10) |
| Stroke           |                            |               |        |          |              |             |              |               |        |          |              |             |
| SERMs            | 61,195                     | 356           | (0.58) | 318.0    | 1.00         | (Reference) | 11,209       | 176           | (1.57) | 55.7     | 1.00         | (Reference) |
| AIs              | 24,633                     | 337           | (1.37) | 120.2    | 0.96         | (0.83-1.12) | 11,209       | 125           | (1.12) | 58.1     | 0.77         | (0.56-1.06) |
| CHD              |                            |               |        |          |              |             |              |               |        |          |              |             |
| SERMs            | 61,195                     | 465           | (0.76) | 318.0    | 1.00         | (Reference) | 11,209       | 176           | (1.57) | 55.7     | 1.00         | (Reference) |
| AIs              | 24,633                     | 389           | (1.58) | 120.2    | 1.19         | (1.03-1.37) | 11,209       | 164           | (1.46) | 58.1     | 1.18         | (0.88-1.59) |
| VTE              |                            |               |        |          |              |             |              |               |        |          |              |             |
| SERMs            | 61,195                     | 154           | (0.25) | 318.0    | 1.00         | (Reference) | 11,209       | 44            | (0.39) | 55.7     | 1.00         | (Reference) |
| AIs              | 24,633                     | 74            | (0.30) | 120.2    | 0.80         | (0.60-1.06) | 11,209       | 29            | (0.26) | 58.1     | 0.74         | (0.42-1.28) |
| HF               |                            |               |        |          |              |             |              |               |        |          |              |             |
| SERMs            | 61,195                     | 206           | (0.34) | 318.0    | 1.00         | (Reference) | 11,209       | 70            | (0.62) | 55.7     | 1.00         | (Reference) |
| AIs              | 24,633                     | 156           | (0.63) | 120.2    | 1.07         | (0.87-1.33) | 11,209       | 61            | (0.54) | 58.1     | 0.95         | (0.62-1.47) |
| Arrhythmia       |                            |               |        |          |              |             |              |               |        |          |              |             |
| SERMs            | 61,195                     | 346           | (0.57) | 318.0    | 1.00         | (Reference) | 11,209       | 99            | (0.88) | 55.7     | 1.00         | (Reference) |
| AIs              | 24,633                     | 205           | (0.83) | 120.2    | 0.95         | (0.79-1.14) | 11,209       | 84            | (0.75) | 58.1     | 0.96         | (0.65-1.43) |
| T2DM             |                            |               |        |          |              |             |              |               |        |          |              |             |
| SERMs            | 61,195                     | 2,136         | (3.49) | 318.0    | 1.00         | (Reference) | 11,209       | 765           | (6.82) | 55.7     | 1.00         | (Reference) |
| AIs              | 24,633                     | 1,490         | (6.05) | 120.2    | 1.00         | (0.94-1.08) | 11,209       | 618           | (5.51) | 58.1     | 0.80         | (0.70-0.93) |

PSM, propensity score matching; PY, person-years; AIs, aromatase inhibitors; SERMs, selective estrogen receptor modulators; CVD, cardiovascular diseases; CHD, coronary heart diseases; VTE, venous thromboembolism; HF, heart failure; T2DM, type 2 diabetes mellitus; \*Adjusted for age, insurance based income, region of residence, histological type, surgery, chemotherapy, radiotherapy, trastuzumab, hypertension, dyslipidemia, osteoporosis, and T2DM (or CVDs).

†SERMs and AIs users were matched as the 1:1 ratio according to age, insurance based income, region of residence, histological type, surgery, chemotherapy, radiotherapy, trastuzumab, hypertension, dyslipidemia, and osteoporosis using the PSM, and T2DM (or CVDs) was added in the adjusted model

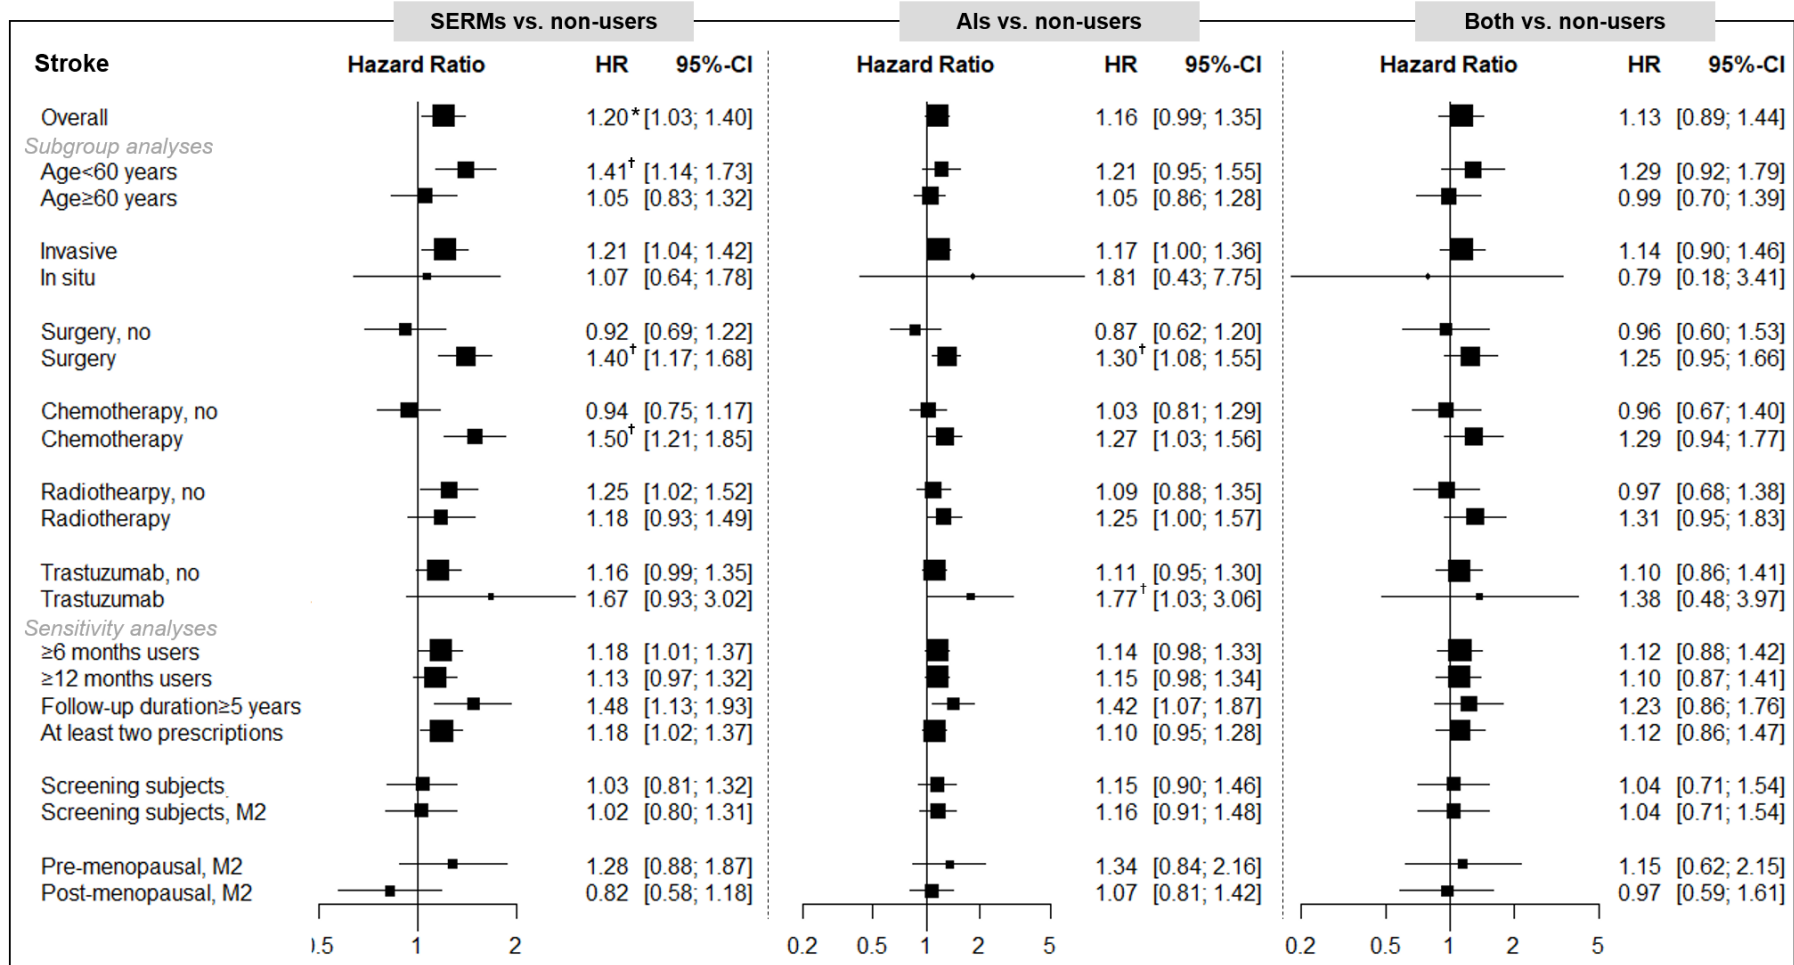

Figure S1. Summary of results for stroke (comparison with non-users)

SERMs, selective estrogen receptor modulators; AIs, aromatase inhibitors. The multivariable adjusted model included age at diagnosis (continuous), insurance-based income level, region of residence, histological subtype, surgery, chemotherapy, radiotherapy, trastuzumab, hypertension, dyslipidemia, osteoporosis, and type 2 diabetes; however, model 2 (M2) additionally include body mass index, lifestyle factors, and menopausal status. The \* mark indicates the significance after multiple-testing by a false discovery rate (FDR; P for FDR < 0.05) in Table 2. The † mark indicates the results of heterogeneity (P-value < 0.1 or I<sup>2</sup> > 50%) by the stratified factor in supplementary materials.

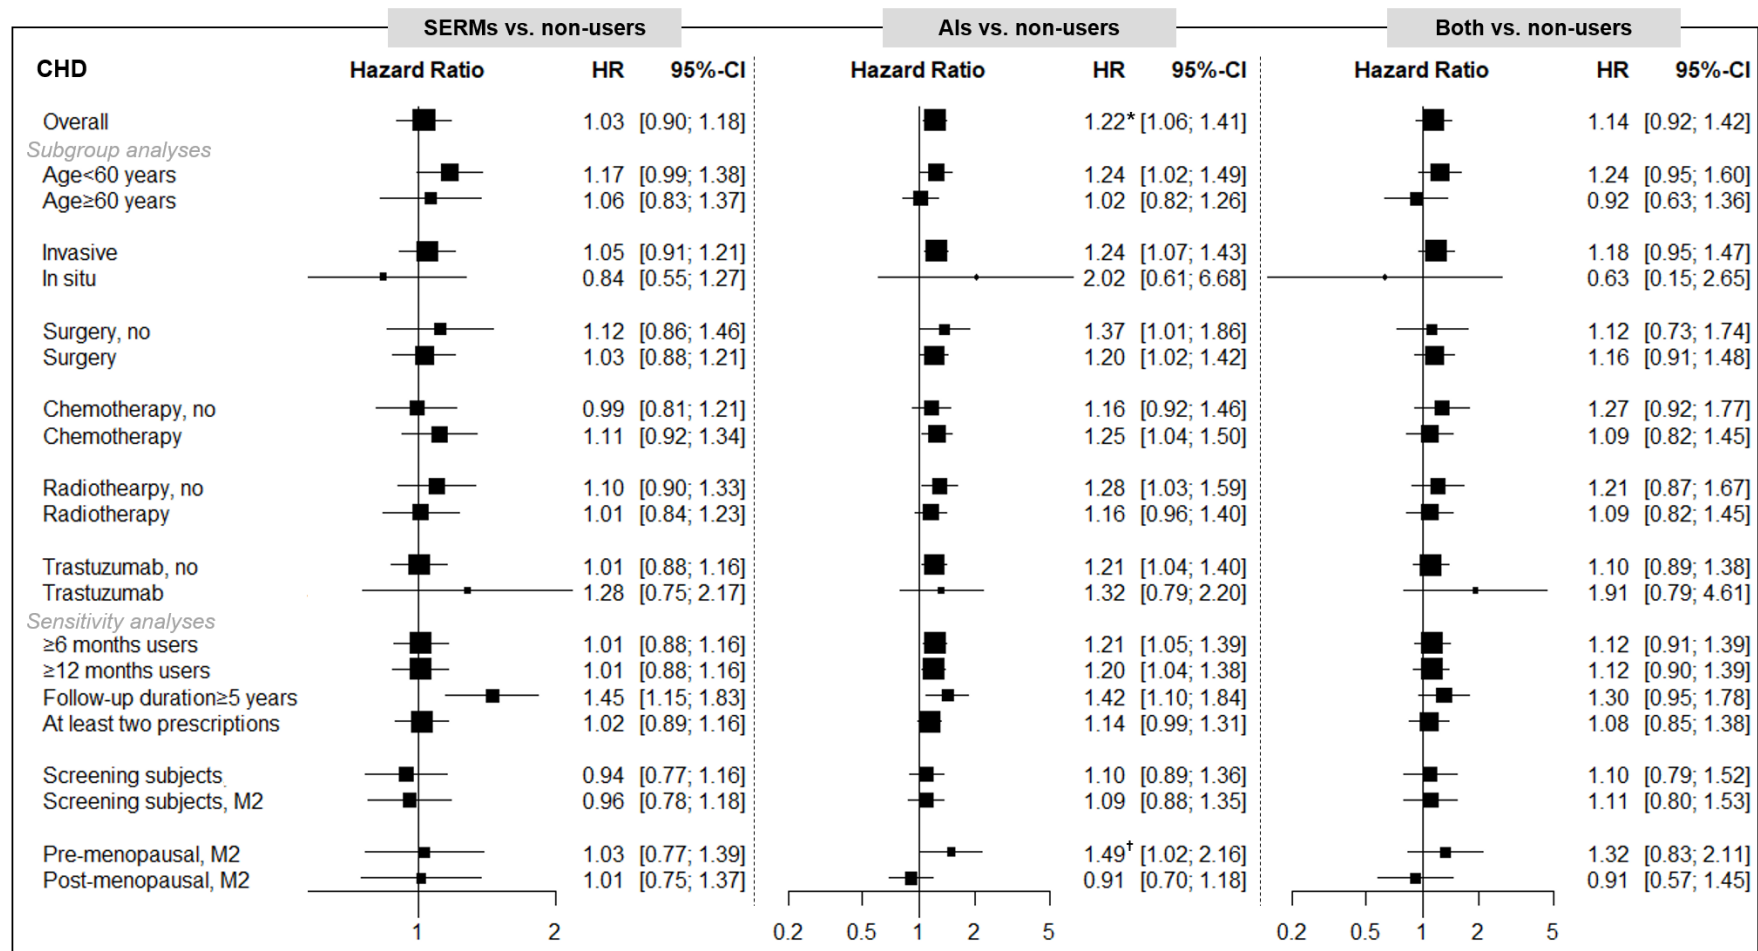

Figure S2. Summary of results for coronary heart diseases (comparison with non-users)

CHD, coronary heart diseases; SERMs, selective estrogen receptor modulators; AIs, aromatase inhibitors. The multivariable adjusted model included age at diagnosis (continuous), insurance-based income level, region of residence, histological subtype, surgery, chemotherapy, radiotherapy, trastuzumab, hypertension, dyslipidemia, osteoporosis, and type 2 diabetes; however, model 2 (M2) additionally include body, mass index, lifestyle factors, and menopausal status. The \* mark indicates the significance after multiple-testing by a false discovery rate (FDR; P for FDR<0.05) in Table 2. The † mark indicates the results of heterogeneity (P-value <0.1 or I<sup>2</sup>>50%) by the stratified factor in supplementary materials.



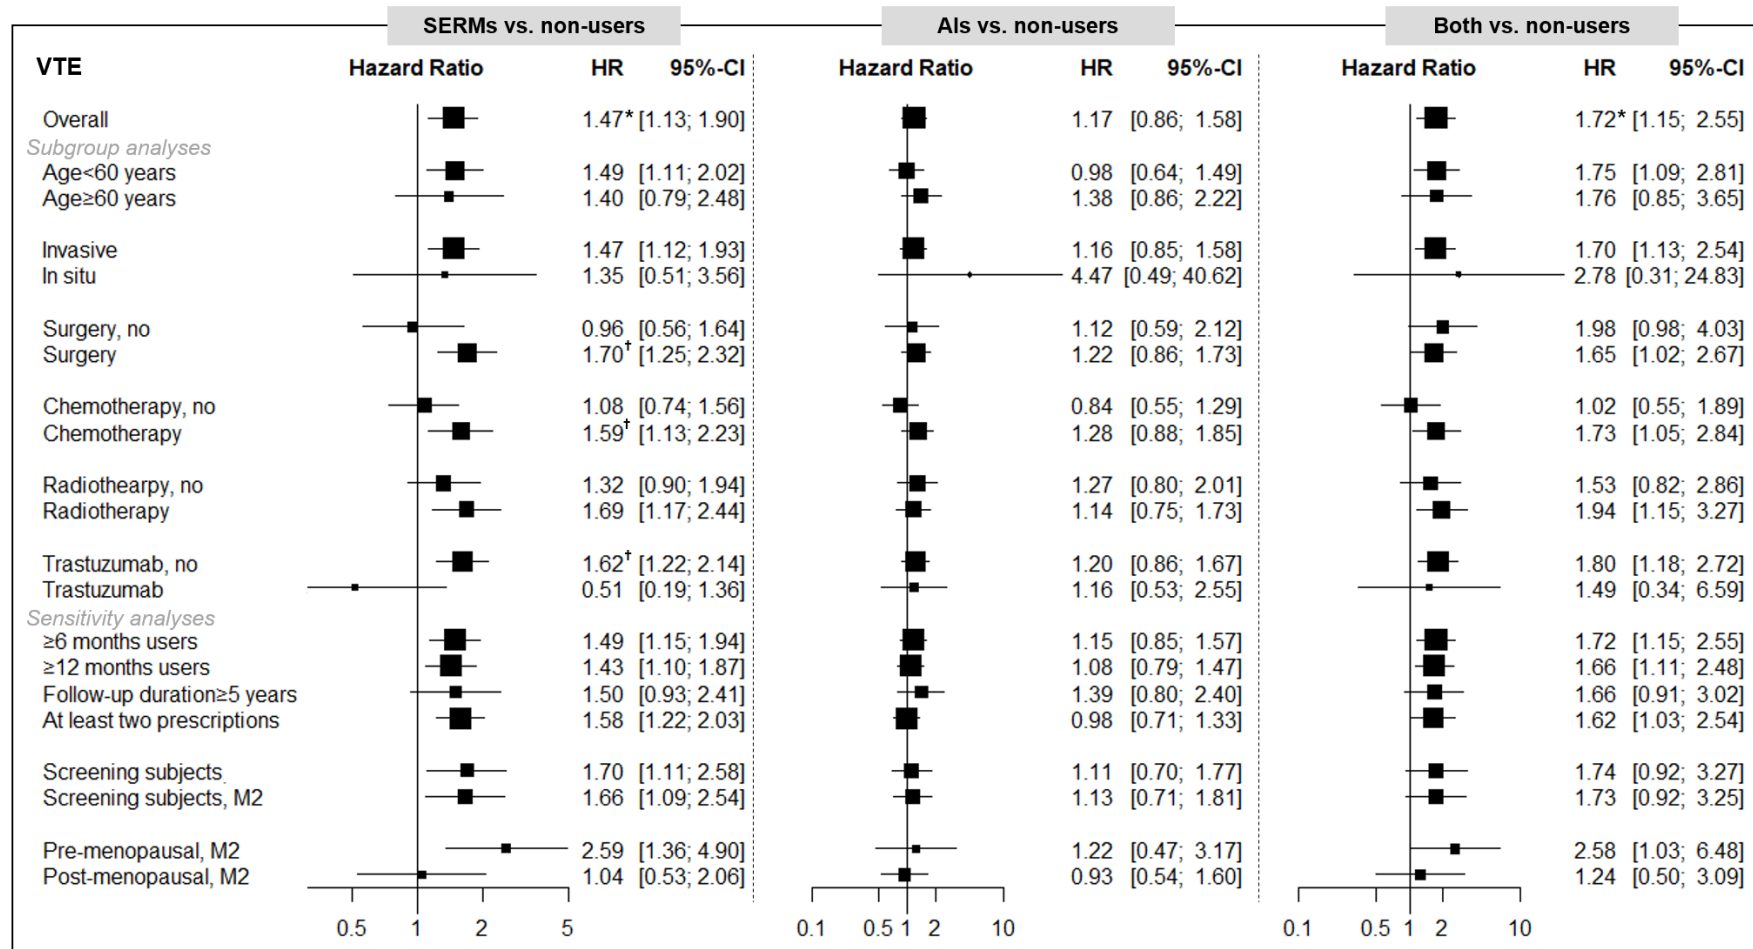

Figure S3. Summary of results for venous thromboembolism (comparison with non-users)

VTE, venous thromboembolism; SERMs, selective estrogen receptor modulators; AIs, aromatase inhibitors. The multivariable adjusted model included age at diagnosis (continuous), insurance-based income level, region of residence, histological subtype, surgery, chemotherapy, radiotherapy, trastuzumab, hypertension, dyslipidemia, osteoporosis, and type 2 diabetes; however, model 2 (M2) additionally include body mass index, lifestyle factors, and menopausal status. The \* mark indicates the significance after multiple-testing by a false discovery rate (FDR; P for FDR < 0.05) in Table 2. The † mark indicates the results of heterogeneity (P-value < 0.1 or I<sup>2</sup> > 50%) by the stratified factor in supplementary materials.

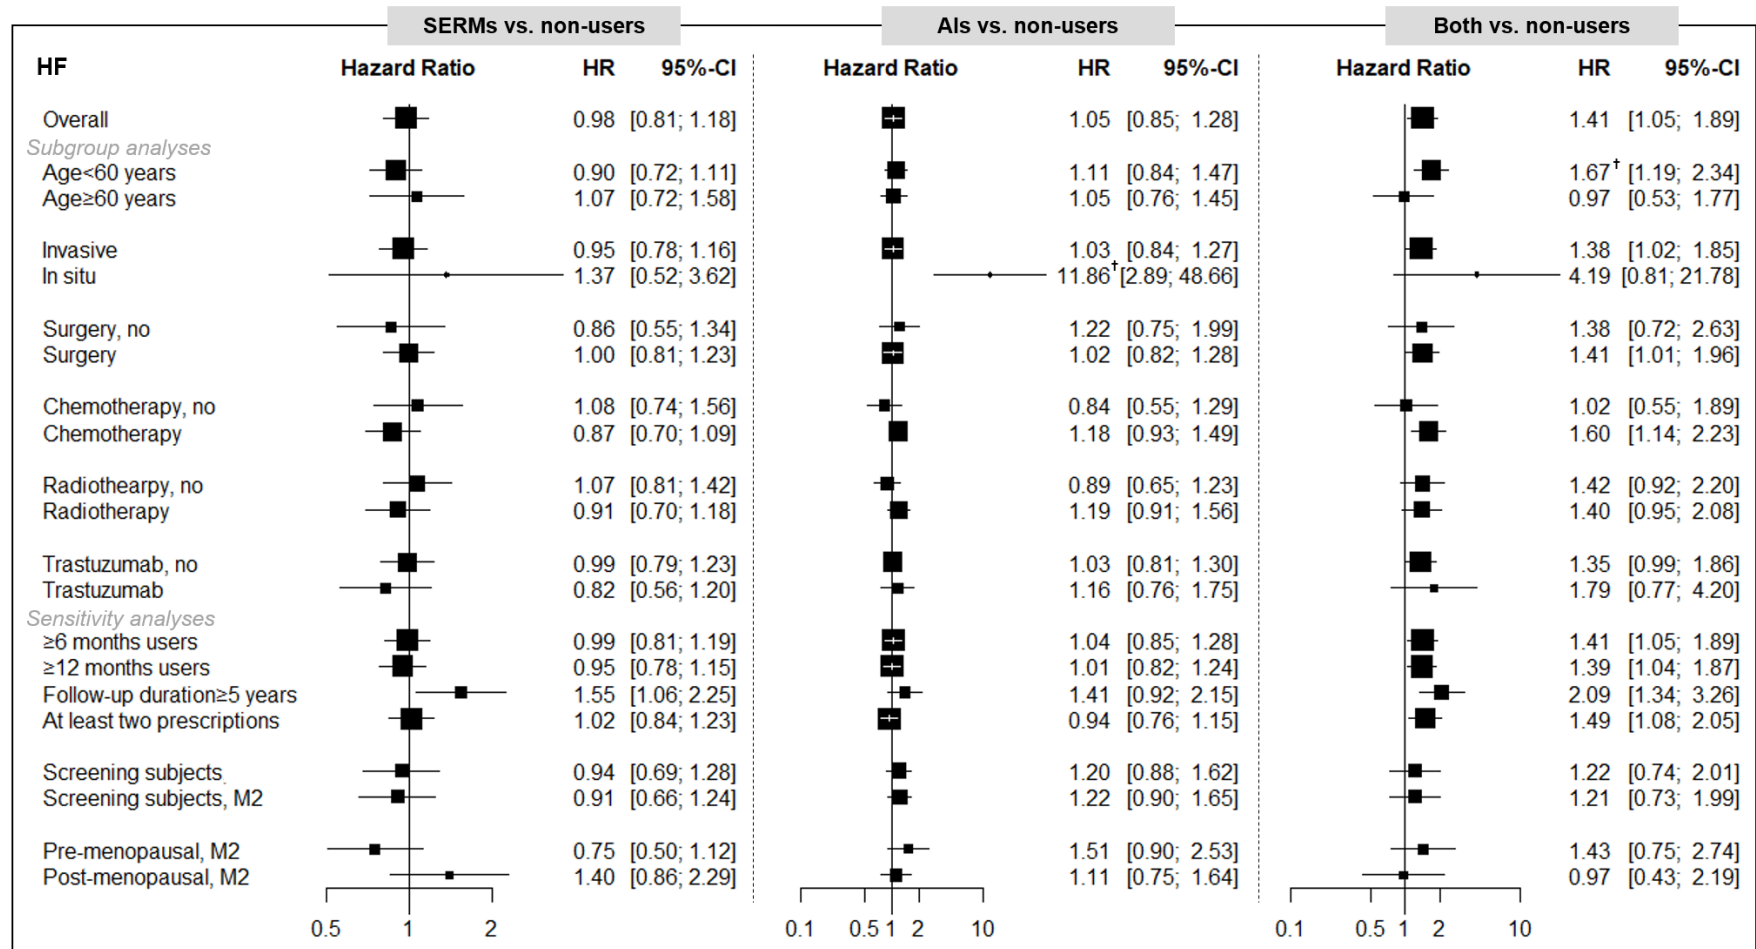

Figure S4. Summary of results for heart failure (comparison with non-users)

HF, heart failure; SERMs, selective estrogen receptor modulators; AIs, aromatase inhibitors. The multivariable adjusted model included age at diagnosis (continuous), insurance-based income level, region of residence, histological subtype, surgery, chemotherapy, radiotherapy, trastuzumab, hypertension, dyslipidemia, osteoporosis, and type 2 diabetes; however, model 2 (M2) additionally include body mass index, lifestyle factors, and menopausal status. The \* mark indicates the significance after multiple-testing by a false discovery rate (FDR; P for FDR < 0.05) in Table 2. The † mark indicates the results of heterogeneity (P-value < 0.1 or I<sup>2</sup> > 50%) by the stratified factor in supplementary materials.

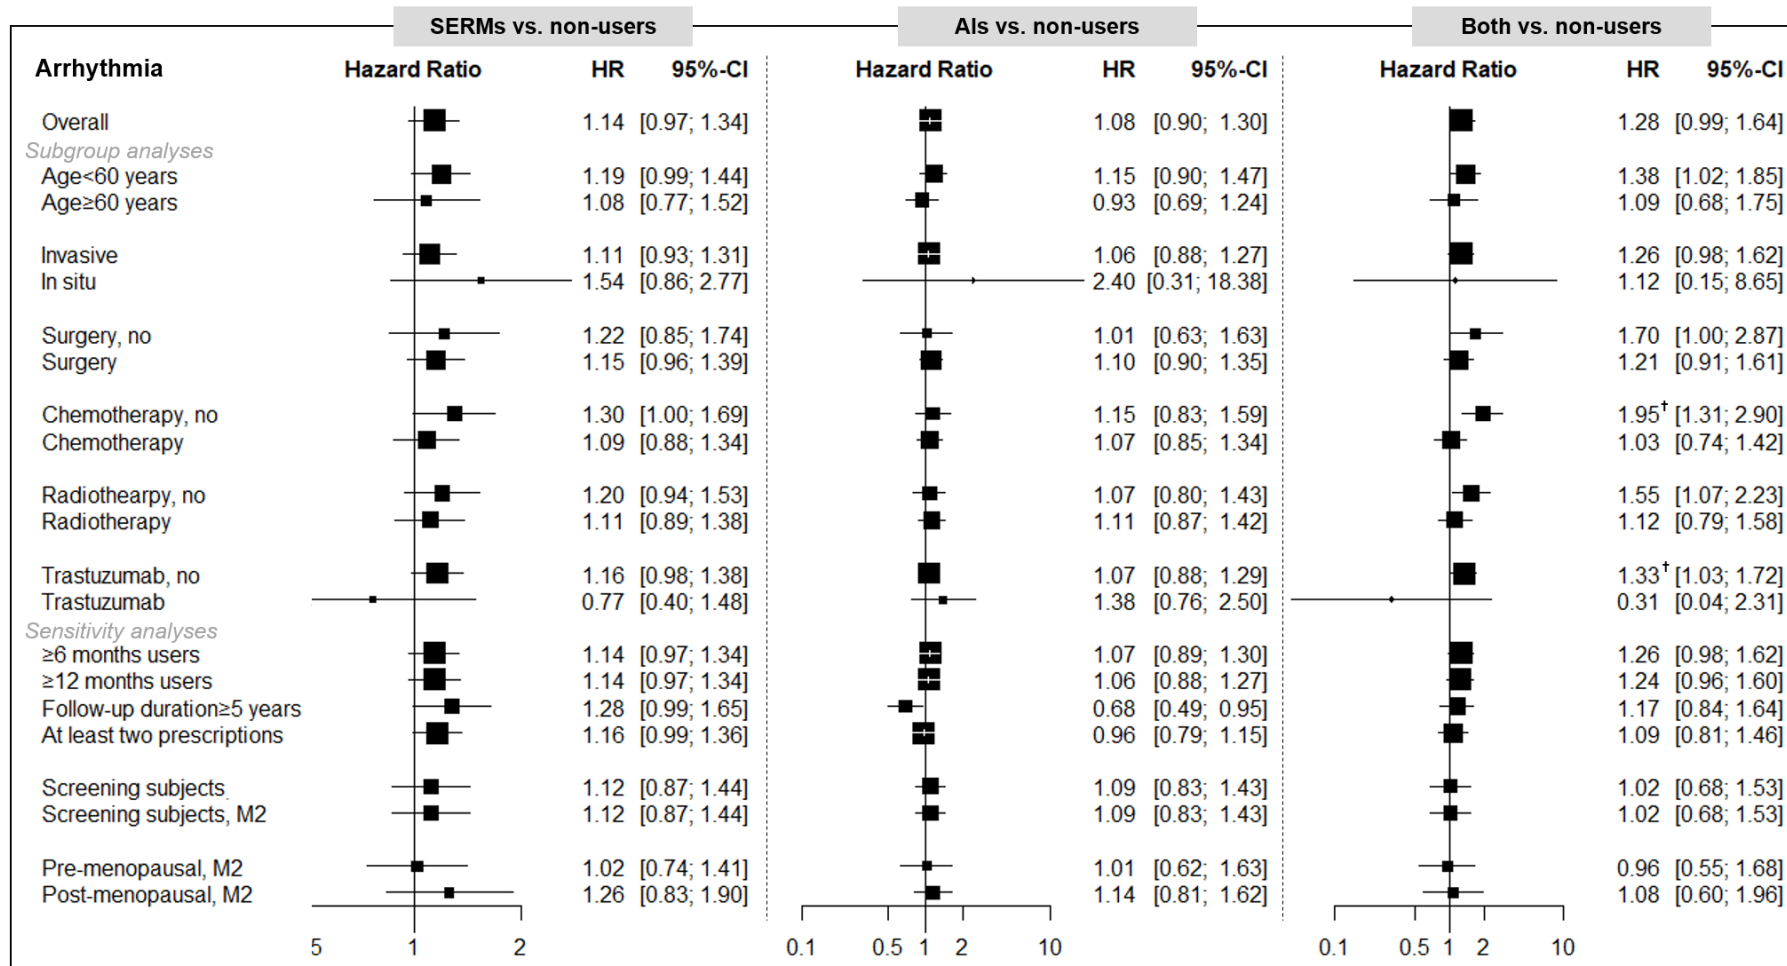

Figure S5. Summary of results for arrhythmia (comparison with non-users)

SERMs, selective estrogen receptor modulators; AIs, aromatase inhibitors. The multivariable adjusted model included age at diagnosis (continuous), insurance-based income level, region of residence, histological subtype, surgery, chemotherapy, radiotherapy, trastuzumab, hypertension, dyslipidemia, osteoporosis, and type 2 diabetes; however, model 2 (M2) additionally include body mass index, lifestyle factors, and menopausal status. The \* mark indicates the significance after multiple-testing by a false discovery rate (FDR; P for FDR<0.05) in Table 2. The † mark indicates the results of heterogeneity (P-value <0.1 or I<sup>2</sup>>50%) by the stratified factor in supplementary materials.
